# Supplementary material for: A synaptotagmin suppressor screen indicates SNARE binding controls the timing and Ca2+ cooperativity of vesicle fusion
Source: eLife. 2017 Sep 12;6:e28409. doi: 10.7554/eLife.28409 (PMC5617632; doi:10.7554/eLife.28409)
Supplement: Figure 1—source data 1. [file elife-28409-fig1-data1.xlsx]

## Sheet: Figure 1 and 2 source data
Figure 1—source data 1
Sample size (n), mean, SEM, and One-way Anova (and nonparametric) Sidak's multiple comparisons test are presented for the data in Figures 1C and Figure 2C,2G,2K and 2O.
eEJC Amplitude (nA)	n	mean	SEM
Control	27	115.985	8.69607
OE WT SYT	24	94.9592	9.35476
OE D1,2N SYT	10	15.8815	3.45839
OE D1,2N SYT R250H	15	105.517	7.4581
OE D1,2N SYT K379E	10	57.6659	7.28809
OE D1,2N SYT P363S	7	49.5857	11.2392
OE D1,2N SYT S332L	13	56.568	7.01753
OE D1,2N SYT R334H	7	122.934	7.81924
eEJC Amplitude (nA)	Adjusted P Value	Summary
Sidak's multiple comparisons test	(One-way ANOVA)
Control vs. OE WT SYT	0.4241	ns
Control vs. OE D1,2N SYT	< 0.0001	****
Control vs. OE D1,2N SYT R250H	0.9983	ns
Control vs. OE D1,2N SYT K379E	0.0004	***
Control vs. OE D1,2N SYT P363S	0.0004	***
Control vs. OE D1,2N SYT S332L	< 0.0001	****
Control vs. OE D1,2N SYT R334H	> 0.9999	ns
OE WT SYT vs. OE D1,2N SYT	< 0.0001	****
OE D1,2N SYT vs. OE D1,2N SYT R250H	< 0.0001	****
OE D1,2N SYT vs. OE D1,2N SYT K379E	0.1356	ns
OE D1,2N SYT vs. OE D1,2N SYT P363S	0.5714	ns
OE D1,2N SYT vs. OE D1,2N SYT S332L	0.1066	ns
OE D1,2N SYT vs. OE D1,2N SYT R334H	< 0.0001	****
OE D1,2N SYT S332L vs. OE D1,2N SYT R334H	0.0019	**
