# Supplementary material for: A synaptotagmin suppressor screen indicates SNARE binding controls the timing and Ca2+ cooperativity of vesicle fusion
Source: eLife. 2017 Sep 12;6:e28409. doi: 10.7554/eLife.28409 (PMC5617632; doi:10.7554/eLife.28409)
Supplement: Figure 1—source data 2. [file elife-28409-fig1-data2.xlsx]

## Sheet: Sheet1
Figure 1 —source data 2
Sample size (n), mean, SEM, and One-way Anova (and nonparametric) Sidak's multiple comparisons test are presented for the data in Figures 1E and Figure 2D,2H,2L and 2P.
mini Frequency (Hz)	n	mean	SEM
Control	19	2.57038	0.261136
OE WT SYT	9	2.70573	0.460833
OE D1,2N SYT	15	5.74309	0.846365
OE D1,2N SYT R250H	21	4.09994	0.558685
OE D1,2N SYT K379E	11	5.475	0.383544
OE D1,2N SYT P363S	10	5.05576	0.277864
OE D1,2N SYT S332L	12	5.70795	0.622189
OE D1,2N SYT R334H	7	4.54444	0.503181
mini Frequency (Hz)	Adjusted P Value	Summary
Sidak's multiple comparisons test	(One-way ANOVA)
Control vs. OE WT SYT	> 0.9999	ns
Control vs. OE D1,2N SYT	0.0003	***
Control vs. OE D1,2N SYT R250H	0.254	ns
Control vs. OE D1,2N SYT K379E	0.0045	**
Control vs. OE D1,2N SYT P363S	0.0353	*
Control vs. OE D1,2N SYT S332L	0.001	**
Control vs. OE D1,2N SYT R334H	0.3674	ns
OE WT SYT vs. OE D1,2N SYT	0.0096	**
OE D1,2N SYT vs. OE D1,2N SYT R250H	0.246	ns
OE D1,2N SYT vs. OE D1,2N SYT K379E	> 0.9999	ns
OE D1,2N SYT vs. OE D1,2N SYT P363S	0.9994	ns
OE D1,2N SYT vs. OE D1,2N SYT S332L	> 0.9999	ns
OE D1,2N SYT vs. OE D1,2N SYT R334H	0.96	ns
OE D1,2N SYT S332L vs. OE D1,2N SYT R334H	0.9772	ns
