# Supplementary material for: A synaptotagmin suppressor screen indicates SNARE binding controls the timing and Ca2+ cooperativity of vesicle fusion
Source: eLife. 2017 Sep 12;6:e28409. doi: 10.7554/eLife.28409 (PMC5617632; doi:10.7554/eLife.28409)
Supplement: Figure 1—source data 3. [file elife-28409-fig1-data3.xlsx]

## Sheet: Figure1-figure supplement 1 dat
Figure 1-source data 3
Sample size (n), mean, SEM, and Student's t test are presented for the data in Figures 1-figure supplement 1 B, C and E
Figure1-figure supplement 1B and 1C (OE D1,2N R250H SYT)
Syt1 protein fold-change normalized to Control	n	mean	SEM
D1,2N SYT (control)	4	1	0
OE D1,2N SYT	4	1.91498	0.260304
D1,2N SYT R250H	4	1.11108	0.10937
OE D1,2N SYT R250H	4	1.82773	0.135324
Sidak's multiple comparisons test	Adjusted P Value	Summary
	(One-way ANOVA)
D1,2N SYT vs. OE D1,2N SYT	0.0069	**
D1,2N SYT vs. D1,2N SYT R250H	0.9926	ns
D1,2N SYT vs. OE D1,2N SYT R250H	0.0141	*
OE D1,2N SYT vs. OE D1,2N SYT R250H	0.9976	ns
D1,2N SYT R250H vs. OE D1,2N SYT R250H	0.0351	*
Figure1-figure supplement 1C (OE D1,2N S332L SYT)
Syt1 protein fold-change normalized to Control	n	mean	SEM
D1,2N SYT (control)	2	1	0
OE D1,2N SYT	2	2.19886	0.220102
OE D1,2N SYT S332L	2	1.94859	0.0291099
Sidak's multiple comparisons test	Adjusted P Value	Summary
	(One-way ANOVA)
D1,2N SYT vs. OE D1,2N SYT	0.021	*
D1,2N SYT vs. OE D1,2N SYT S332L	0.0402	*
OE D1,2N SYT vs. OE D1,2N SYT S332L	0.5969	ns
Figure1-figure supplement 1C (OE D1,2N R334H SYT)
Syt1 protein fold-change normalized to Control	n	mean	SEM
D1,2N SYT (control)	3	1	0
OE D1,2N SYT	3	2.41761	0.296805
OE D1,2N SYT R334H	3	1.86511	0.0874695
Sidak's multiple comparisons test	Adjusted P Value	Summary
	(One-way ANOVA)
D1,2N SYT vs. OE D1,2N SYT	0.0033	**
D1,2N SYT vs. OE D1,2N SYT R334H	0.0325	*
OE D1,2N SYT vs. OE D1,2N SYT R334H	0.1522	ns
Figure1-figure supplement 1C (OE D1,2N K379E SYT)
Syt1 protein fold-change normalized to Control	n	mean	SEM
D1,2N SYT (control)	2	1	0
OE D1,2N SYT	2	2.31218	0.0425639
OE D1,2N SYT K379K	2	2.25041	0.104522
Sidak's multiple comparisons test	Adjusted P Value	Summary
	(One-way ANOVA)
D1,2N SYT vs. OE D1,2N SYT	0.0022	**
D1,2N SYT vs. OE D1,2N SYT K379E	0.0026	**
OE D1,2N SYT vs. OE D1,2N SYT K379E	0.9093	ns
Figure1-figure supplement 1C (OE D1,2N E348K SYT)
Syt1 protein fold-change normalized to Control	n	mean	SEM
D1,2N SYT (control)	2	1	0
OE D1,2N SYT	2	2.09376	0.0151033
OE D1,2N SYT E348K	2	1.85025	0.0862314
Sidak's multiple comparisons test	Adjusted P Value	Summary
	(One-way ANOVA)
D1,2N SYT vs. OE D1,2N SYT	0.0018	**
D1,2N SYT vs. OE D1,2N SYT E348K	0.0038	**
OE D1,2N SYT vs. OE D1,2N SYT E348K	0.1215	ns
Figure1-figure supplement 1C (OE D1,2N P363S SYT)
Syt1 protein fold-change normalized to Control	n	mean	SEM
D1,2N SYT (control)	5	1	0
OE D1,2N SYT	5	1.81001	0.15903
OE D1,2N SYT P363S	5	1.54525	0.0951852
Sidak's multiple comparisons test	Adjusted P Value	Summary
	(One-way ANOVA)
D1,2N SYT vs. OE D1,2N SYT	0.0005	***
D1,2N SYT vs. OE D1,2N SYT P363S	0.0108	*
OE D1,2N SYT vs. OE D1,2N SYT P363S	0.2847	ns
Figure1-figure supplement 1C (OE D1,2N Y391N SYT)
Syt1 protein fold-change normalized to Control	n	mean	SEM
D1,2N SYT (control)	2	1	0
OE D1,2N SYT	2	1.8031	0.0703153
OE D1,2N SYT Y391N	2	1.91505	0.118339
Sidak's multiple comparisons test	Adjusted P Value	Summary
	(One-way ANOVA)
D1,2N SYT vs. OE D1,2N SYT	0.0168	*
D1,2N SYT vs. OE D1,2N SYT Y391N	0.0116	*
OE D1,2N SYT vs. OE D1,2N SYT Y391N	0.7759	ns
Figure1-figure supplement 1C (OE D1,2N Y392N SYT)
Syt1 protein fold-change normalized to Control	n	mean	SEM
D1,2N SYT (control)	2	1	0
OE D1,2N SYT	2	1.8638	0.134702
OE D1,2N SYT Y392N	2	2.06958	0.118639
Sidak's multiple comparisons test	Adjusted P Value	Summary
	(One-way ANOVA)
D1,2N SYT vs. OE D1,2N SYT	0.029	*
D1,2N SYT vs. OE D1,2N SYT Y392N	0.0159	*
OE D1,2N SYT vs. OE D1,2N SYT Y392N	0.5864	ns
Figure1-figure supplement 1C (OE D1,2N A455T SYT)
Syt1 protein fold-change normalized to Control	n	mean	SEM
D1,2N SYT (control)	4	1	0
OE D1,2N SYT	4	1.96944	0.227302
OE D1,2N SYT A455T	4	1.87371	0.170797
Sidak's multiple comparisons test	Adjusted P Value	Summary
	(One-way ANOVA)
D1,2N SYT vs. OE D1,2N SYT	0.0167	*
D1,2N SYT vs. OE D1,2N SYT A455T	0.0293	*
OE D1,2N SYT vs. OE D1,2N SYT A455T	0.9801	ns
Figure1-figure supplement 1C (OE D1,2N G373D SYT)
Syt1 protein fold-change normalized to Control	n	mean	SEM
D1,2N SYT (control)	2	1	0
OE D1,2N SYT	2	2.59229	0.284907
OE D1,2N SYT G373D	2	2.25088	0.130366
Sidak's multiple comparisons test	Adjusted P Value	Summary
	(One-way ANOVA)
D1,2N SYT vs. OE D1,2N SYT	0.0026	**
D1,2N SYT vs. OE D1,2N SYT G373D	0.0059	**
OE D1,2N SYT vs. OE D1,2N SYT G373D	0.1336	ns
Figure1-figure supplement 1E (OE D1,2N V211E SYT)
Syt1 protein change folds normalized to Control
D1,2N SYT (control)	n	mean	SEM
D1,2N SYT	3	1	0
OE D1,2N SYT	3	1.87718	0.216756
OE D1,2N SYT V211E	3	0.651961	0.0482459
Sidak's multiple comparisons test	Adjusted P Value	Summary
	(One-way ANOVA)
D1,2N SYT vs. OE D1,2N SYT	0.0086	**
D1,2N SYT vs. OE D1,2N SYT V211E	0.2791	ns
OE D1,2N SYT vs. OE D1,2N SYT V211E	0.0015	**
Figure1-figure supplement 1E (OE D1,2N E245K SYT)
Syt1 protein fold-change normalized to Control	n	mean	SEM
D1,2N SYT (control)	3	1	0
OE D1,2N SYT	3	2.75723	0.424737
OE D1,2N SYT E245K	3	1.09233	0.12475
Sidak's multiple comparisons test	Adjusted P Value	Summary
	(One-way ANOVA)
D1,2N SYT vs. OE D1,2N SYT	0.0084	**
D1,2N SYT vs. OE D1,2N SYT E245K	0.9928	ns
OE D1,2N SYT vs. OE D1,2N SYT E245K	0.011	*
Figure1-figure supplement 1E (OE D1,2N T381I SYT)
Syt1 protein fold-change normalized to Control	n	mean	SEM
D1,2N SYT (control)	3	1	0
OE D1,2N SYT	3	1.77202	0.156884
OE D1,2N SYT T381I	3	0.802452	0.182057
Sidak's multiple comparisons test	Adjusted P Value	Summary
	(One-way ANOVA)
D1,2N SYT vs. OE D1,2N SYT	0.0228	*
D1,2N SYT vs. OE D1,2N SYT T381I	0.7291	ns
OE D1,2N SYT vs. OE D1,2N SYT T381I	0.0078	**
Figure1-figure supplement 1E (OE D1,2N Y390L SYT)
Syt1 protein fold-change normalized to Control	n	mean	SEM
D1,2N SYT (control)	3	1	0
OE D1,2N SYT	3	2.01151	0.181013
OE D1,2N SYT Y390L	3	0.99416	0.0629264
Sidak's multiple comparisons test	Adjusted P Value	Summary
	(One-way ANOVA)
D1,2N SYT vs. OE D1,2N SYT	0.0019	**
D1,2N SYT vs. OE D1,2N SYT Y390L	> 0.9999	ns
OE D1,2N SYT vs. OE D1,2N SYT Y390L	0.0019	**
Figure1-figure supplement 1E (OE D1,2N G427D SYT)
Syt1 protein fold-change normalized to Control	n	mean	SEM
D1,2N SYT (control)	3	1	0
OE D1,2N SYT	3	1.87718	0.216756
D1,2N SYT G427D	3	0.862739	0.0384346
OE D1,2N SYT G427D	3	0.726224	0.0428127
Sidak's multiple comparisons test	Adjusted P Value	Summary
	(One-way ANOVA)
D1,2N SYT vs. OE D1,2N SYT	0.0019	**
D1,2N SYT vs. OE D1,2N SYT G427D	> 0.9999	ns
OE D1,2N SYT vs. OE D1,2N SYT G427D	0.0019	**
