# Supplementary material for: A synaptotagmin suppressor screen indicates SNARE binding controls the timing and Ca2+ cooperativity of vesicle fusion
Source: eLife. 2017 Sep 12;6:e28409. doi: 10.7554/eLife.28409 (PMC5617632; doi:10.7554/eLife.28409)
Supplement: Figure 2—source data 1. [file elife-28409-fig2-data1.xlsx]

## Sheet: Figure2-fig supplement 2 data
Figure 2-source data 1.
Sample size (n), mean, SEM, and One-way Anova (and nonparametric) Turkey's multiple comparisons test are presented for the data in Figures 2-figure supplement 2 C, D, F, G, I, J, L, M
Figures 2-figure supplement 2 C
eEJC Amplitude (nA)	n	mean	SEM
Control	8	196.7	7.8
OE WT SYT	10	192.2	11.4
OE R250H SYT	8	177	5.3
eEJC Amplitude (nA)	Adjusted P Value	Summary
Tukey's multiple comparisons test	(One-way ANOVA)
Control vs. OE WT SYT	0.9353	ns
Control vs. OE R250H SYT	0.3279	ns
OE WT SYT vs. OE R250H SYT	0.4706	ns
Figures 2-figure supplement 2 D
mini Frequency (Hz)	n	mean	SEM
Control	8	1.4	0.2
OE WT SYT	10	2.5	0.5
OE R250H SYT	9	2.3	0.4
mini Frequency (Hz)	Adjusted P Value	Summary
Tukey's multiple comparisons test	(One-way ANOVA)
Control vs. OE WT SYT	0.2811	ns
Control vs. OE R250H SYT	0.1421	ns
OE WT SYT vs. OE R250H SYT	0.924	ns
Figures 2-figure supplement 2 F
eEJC Amplitude (nA)	n	mean	SEM
Control	8	212.2	10.6
OE WT SYT	8	184.2	8.4
OE K379E SYT	10	187.9	12.5
eEJC Amplitude (nA)	Adjusted P Value	Summary
Tukey's multiple comparisons test	(One-way ANOVA)
Control vs. OE WT SYT	0.2177	ns
Control vs. OE K379E SYT	0.275	ns
OE WT SYT vs. OE K379E SYT	0.9689	ns
Figures 2-figure supplement 2 G
mini Frequency (Hz)	n	mean	SEM
Control	10	1.9	0.1
OE WT SYT	9	2.5	0.2
OE K379E SYT	10	2.1	0.3
mini Frequency (Hz)	Adjusted P Value	Summary
Tukey's multiple comparisons test	(One-way ANOVA)
Control vs. OE WT SYT	0.1922	ns
Control vs. OE K379E SYT	0.8167	ns
OE WT SYT vs. OE K379E SYT	0.4644	ns
Figures 2-figure supplement 2 I
eEJC Amplitude (nA)	n	mean	SEM
Control	8	207	11.8
OE WT SYT	8	190.4	6.5
OE P363S SYT	8	176.3	11
eEJC Amplitude (nA)	Adjusted P Value	Summary
Tukey's multiple comparisons test	(One-way ANOVA)
Control vs. OE WT SYT	0.4839	ns
Control vs. OE P363S SYT	0.1015	ns
OE WT SYT vs. OE P363S SYT	0.5894	ns
Figures 2-figure supplement 2 J
mini Frequency (Hz)	n	mean	SEM
Control	8	2	0.2
OE WT SYT	9	2.5	0.3
OE P363S SYT	10	2.5	0.3
mini Frequency (Hz)	Adjusted P Value	Summary
Tukey's multiple comparisons test	(One-way ANOVA)
Control vs. OE WT SYT	0.3991	ns
Control vs. OE P363S SYT	0.4657	ns
OE WT SYT vs. OE P363S SYT	0.9865	ns
Figures 2-figure supplement 2 L
eEJC Amplitude (nA)	n	mean	SEM
Control	9	186	11.9
OE WT SYT	9	196.1	9.2
OE S332L SYT	10	190.9	11
OE R334H SYT	10	175.3	13.6
eEJC Amplitude (nA)	Adjusted P Value	Summary
Tukey's multiple comparisons test	(One-way ANOVA)
Control vs. OE WT SYT	0.9326	ns
Control vs. OE S332L SYT	0.9908	ns
Control vs. OE R334H SYT	0.917	ns
OE WT SYT vs. OE S332L SYT	0.9889	ns
OE WT SYT vs. OE R334H SYT	0.597	ns
OE S332L SYT vs. OE R334H SYT	0.7697	ns
Figures 2-figure supplement 2 M
mini Frequency (Hz)	n	mean	SEM
Control	8	1.6	0.3
OE WT SYT	10	1.8	0.2
OE S332L SYT	9	1.8	0.2
OE R334H SYT	7	2.4	0.3
mini Frequency (Hz)	Adjusted P Value	Summary
Tukey's multiple comparisons test	(One-way ANOVA)
Control vs. OE WT SYT	0.9557	ns
Control vs. OE S332L SYT	0.9377	ns
Control vs. OE R334H SYT	0.2183	ns
OE WT SYT vs. OE S332L SYT	0.9998	ns
OE WT SYT vs. OE R334H SYT	0.4015	ns
OE S332L SYT vs. OE R334H SYT	0.4649	ns
