# Supplementary material for: A synaptotagmin suppressor screen indicates SNARE binding controls the timing and Ca2+ cooperativity of vesicle fusion
Source: eLife. 2017 Sep 12;6:e28409. doi: 10.7554/eLife.28409 (PMC5617632; doi:10.7554/eLife.28409)
Supplement: Figure 3—source data 1. [file elife-28409-fig3-data1.xlsx]

## Sheet: Sheet1
Figure 3-source data 1
Sample size (n), mean, SEM, and One-way Anova (and nonparametric) Sidak's multiple comparisons test are presented for the data in Figures 3B, Figure 6B and Figure 8B.
eEJC Amplitude (nA)	n	mean	SEM
Null	11	3.5119	0.446305
WT SYT Rescue	12	109.706	11.4964
R250H SYT Rescue	15	44.1229	6.76494
P363S SYT Rescue	20	9.7597	1.65817
K379E SYT Rescue	20	57.3489	4.86791
S332L SYT Rescue	17	14.8727	3.02828
R334H SYT Rescue	16	8.83043	0.896462
eEJC Amplitude (nA)	Adjusted P Value	Summary
Sidak's multiple comparisons test	(One-way ANOVA)
Null vs. WT SYT Rescue	< 0.0001	****
Null vs. R250H SYT Rescue	< 0.0001	****
Null vs. P363S SYT Rescue	0.9977	ns
Null vs. K379E SYT Rescue	< 0.0001	****
Null vs. S332L SYT Rescue	0.8282	ns
Null vs. R334H SYT Rescue	0.9997	ns
WT SYT Rescue vs. R250H SYT Rescue	< 0.0001	****
WT SYT Rescue vs. P363S SYT Rescue	< 0.0001	****
WT SYT Rescue vs. K379E SYT Rescue	< 0.0001	****
WT SYT Rescue vs. S332L SYT Rescue	< 0.0001	****
WT SYT Rescue vs. R334H SYT Rescue	< 0.0001	****
S332L SYT Rescue vs. R334H SYT Rescue	0.9966	ns
