# Supplementary material for: A synaptotagmin suppressor screen indicates SNARE binding controls the timing and Ca2+ cooperativity of vesicle fusion
Source: eLife. 2017 Sep 12;6:e28409. doi: 10.7554/eLife.28409 (PMC5617632; doi:10.7554/eLife.28409)
Supplement: Figure 3—source data 3. [file elife-28409-fig3-data3.xlsx]

## Sheet: Sheet1
Figure 3-source data 3.
Sample size (n), mean, SEM, and One-way Anova (and nonparametric) Sidak's multiple comparisons test are presented for the data in Figures 3F, Figure 6F and Figure 8F.
Asynchr. Component (% of total Release)	n	mean(%)	SEM(%)
Null	11	66.3182	2.06736
WT SYT Rescue	12	4.38333	0.89365
R250H SYT Rescue	15	16.0331	2.18265
P363S SYT Rescue	20	23.215	3.19628
K379E SYT Rescue	20	8.2	1.1323
S332L SYT Rescue	17	28.7059	2.91013
R334H SYT Rescue	16	41.75	4.01922
Asynchr. Component (% of total Release)	Adjusted P Value	Summary
Sidak's multiple comparisons test	(One-way ANOVA)
Null vs. WT SYT Rescue	< 0.0001	****
Null vs. R250H SYT Rescue	< 0.0001	****
Null vs. P363S SYT Rescue	< 0.0001	****
Null vs. K379E SYT Rescue	< 0.0001	****
Null vs. S332L SYT Rescue	< 0.0001	****
Null vs. R334H SYT Rescue	< 0.0001	****
WT SYT Rescue vs. R250H SYT Rescue	0.0736	ns
WT SYT Rescue vs. P363S SYT Rescue	< 0.0001	****
WT SYT Rescue vs. K379E SYT Rescue	0.9926	ns
WT SYT Rescue vs. S332L SYT Rescue	< 0.0001	****
WT SYT Rescue vs. R334H SYT Rescue	< 0.0001	****
S332L SYT Rescue vs. R334H SYT Rescue	0.0091	**
