# Supplementary material for: A synaptotagmin suppressor screen indicates SNARE binding controls the timing and Ca2+ cooperativity of vesicle fusion
Source: eLife. 2017 Sep 12;6:e28409. doi: 10.7554/eLife.28409 (PMC5617632; doi:10.7554/eLife.28409)
Supplement: Figure 3—source data 4. [file elife-28409-fig3-data4.xlsx]

## Sheet: Figure 3-6-8 source data
Figure 3-source data 4
Sample size (n), mean, SEM, and One-way Anova (and nonparametric) Sidak's multiple comparisons test are presented for the data in Figures 3G, Figure 6G and Figure 8G.
mini Frequency (Hz)	n	mean	SEM
Null	23	4.24901	0.278759
WT SYT Rescue	20	1.63155	0.214452
R250H SYT Rescue	25	6.68563	0.252061
P363S SYT Rescue	21	2.36395	0.245298
K379E SYT Rescue	23	3.95495	0.347185
S332L SYT Rescue	15	3.34422	0.381383
R334H SYT Rescue	15	8.25833	0.543588
mini Frequency (Hz)	Adjusted P Value	Summary
Sidak's multiple comparisons test	(One-way ANOVA)
Null vs. WT SYT Rescue	< 0.0001	****
Null vs. R250H SYT Rescue	< 0.0001	****
Null vs. P363S SYT Rescue	0.0004	***
Null vs. K379E SYT Rescue	0.9997	ns
Null vs. S332L SYT Rescue	0.5509	ns
Null vs. R334H SYT Rescue	< 0.0001	****
WT SYT Rescue vs. R250H SYT Rescue	< 0.0001	****
WT SYT Rescue vs. P363S SYT Rescue	0.7573	ns
WT SYT Rescue vs. K379E SYT Rescue	< 0.0001	****
WT SYT Rescue vs. S332L SYT Rescue	0.0096	**
WT SYT Rescue vs. R334H SYT Rescue	< 0.0001	****
S332L SYT Rescue vs. R334H SYT Rescue	< 0.0001	****
