# Supplementary material for: A synaptotagmin suppressor screen indicates SNARE binding controls the timing and Ca2+ cooperativity of vesicle fusion
Source: eLife. 2017 Sep 12;6:e28409. doi: 10.7554/eLife.28409 (PMC5617632; doi:10.7554/eLife.28409)
Supplement: Figure 3—source data 5. [file elife-28409-fig3-data5.xlsx]

## Sheet: Figure 3-fig supplement 2 
Figure 3-source data 5
Sample size (n), mean, SEM, and One-way Anova (and nonparametric) multiple comparisons test are presented for the data in Figures 3-figure supplement 2
Figures 3-figure supplement 2 C
eEJC Amplitude (nA)	n	mean	SEM
White	8	266	22.1
WT SYT Rescue	9	81.9	14.1
Null	11	3.5	0.4
eEJC Amplitude (nA)	Adjusted P Value	Summary
Dunnett's multiple comparisons test	(One-way ANOVA)
White vs. WT SYT Rescue	< 0.0001	****
White vs. Null	< 0.0001	****
Figures 3-figure supplement 2 D
Rescue Lethality Ratio (%)	n	mean (%)	SEM (%)
Null	4	0.8	0.8
WT SYT Rescue	3	94.9	3.6
R250H SYT Rescue	3	66.4	6.3
S332L SYT Rescue	5	31.3	8.3
R334H SYT Rescue	3	1.4	1.3
P363S SYT Rescue	3	1.2	1.2
K379E SYT Rescue	5	78	2.5
Rescue Lethality Ratio (%)	Adjusted P Value	Summary
Sidak's multiple comparisons test	(One-way ANOVA)
Null vs. WT SYT Rescue	< 0.0001	****
Null vs. R250H SYT Rescue	< 0.0001	****
Null vs. S332L SYT Rescue	0.0021	**
Null vs. R334H SYT Rescue	> 0.9999	ns
Null vs. P363S SYT Rescue	> 0.9999	ns
Null vs. K379E SYT Rescue	< 0.0001	****
WT SYT Rescue vs. R250H SYT Rescue	0.0242	*
WT SYT Rescue vs. S332L SYT Rescue	< 0.0001	****
WT SYT Rescue vs. R334H SYT Rescue	< 0.0001	****
WT SYT Rescue vs. P363S SYT Rescue	< 0.0001	****
WT SYT Rescue vs. K379E SYT Rescue	0.2877	ns
