# Supplementary material for: A synaptotagmin suppressor screen indicates SNARE binding controls the timing and Ca2+ cooperativity of vesicle fusion
Source: eLife. 2017 Sep 12;6:e28409. doi: 10.7554/eLife.28409 (PMC5617632; doi:10.7554/eLife.28409)
Supplement: Figure 8—source data 1. [file elife-28409-fig8-data1.xlsx]

## Sheet: Figure 8H source data
Figure 8—source data 1
Sample size (n), mean, SEM are presented for the data in Figures 8H.
eEJC Amplitude (nA) in 0.1 mM Calcium Conc.	n	mean(nA)	SEM(nA)	Failure Ratio(%)	SEM(%)
Null	7	0.0654089	0.027302	94.9153	1.95712
WT SYT Rescue	13	1.65235	0.648243	48.3703	9.82619
R250H SYT Rescue	9	0.546792	0.181094	70.2448	9.30966
K379E SYT Rescue	9	0.667968	0.376352	78.1544	10.1043
S332L SYT Rescue	9	0.130286	0.0431484	91.7137	2.50195
R334H SYT Rescue	8	0.116677	0.049387	92.161	2.96934
eEJC Amplitude (nA) in 0.175 mM Calcium Conc.	n	mean(nA)	SEM(nA)	Failure Ratio(%)	SEM(%)
Null	12	0.332209	0.0749903	75	5.46086
WT SYT Rescue	11	2.02114	0.731325	38.6189	8.6742
R250H SYT Rescue	13	0.539104	0.134808	63.459	6.56827
K379E SYT Rescue	12	2.04092	0.41638	28.2486	7.68917
S332L SYT Rescue	13	0.381198	0.0775263	75.6193	4.6912
R334H SYT Rescue	10	0.383649	0.119577	71.5254	8.33329
eEJC Amplitude (nA) in 0.25 mM Calcium Conc.	n	mean(nA)	SEM(nA)	Failure Ratio(%)	SEM(%)
Null	10	0.625791	0.12475	60.5085	6.69938
WT SYT Rescue	11	3.16977	0.351391	11.094	4.74116
R250H SYT Rescue	11	3.33051	0.659012	14.9461	4.78204
K379E SYT Rescue	12	2.75672	0.439752	16.3842	6.99869
S332L SYT Rescue	13	0.787421	0.110565	49.4133	5.09143
R334H SYT Rescue	14	1.17888	0.159381	37.7724	5.86444
eEJC Amplitude (nA) in 0.3 mM Calcium Conc.	n	mean(nA)	SEM(nA)	Failure Ratio(%)	SEM(%)
Null	9	0.76066	0.164006	59.1337	7.93702
WT SYT Rescue	11	5.33203	1.10894	8.01233	4.28229
R250H SYT Rescue	12	3.15584	0.315658	13.1356	4.2405
K379E SYT Rescue	15	6.59441	1.09468	3.38983	2.10528
S332L SYT Rescue	10	2.94671	0.575223	21.5254	6.07995
R334H SYT Rescue	10	0.713953	0.195191	65.5932	6.94272
eEJC Amplitude (nA) in 0.4 mM Calcium Conc.	n	mean(nA)	SEM(nA)	Failure Ratio(%)	SEM(%)
Null	9	0.699999	0.134472	58.1921	8.1677
WT SYT Rescue	11	10.2191	1.92896	7.08783	5.35403
R250H SYT Rescue	10	5.3099	1.15407	10.339	4.58603
K379E SYT Rescue	13	10.8178	1.58335	0	0
S332L SYT Rescue	9	3.7581	0.684901	9.79284	2.70624
R334H SYT Rescue	11	2.05715	0.506386	40.3698	10.0528
eEJC Amplitude (nA) in 0.6 mM Calcium Conc.	n	mean(nA)	SEM(nA)	Failure Ratio(%)	SEM(%)
Null	10	1.51183	0.224913	40.678	5.64406
WT SYT Rescue	14	26.5297	3.31601	0	0
R250H SYT Rescue	10	13.5002	3.58513	2.88136	1.92505
K379E SYT Rescue	10	28.3945	3.57371	0	0
S332L SYT Rescue	11	4.44997	1.29223	13.5273	3.70647
R334H SYT Rescue	9	3.07797	0.587038	23.1638	7.60616
eEJC Amplitude (nA) in 0.8 mM Calcium Conc.	n	mean(nA)	SEM(nA)	Failure Ratio(%)	SEM(%)
Null	15	1.87776	0.210756	33.7903	6.27748
WT SYT Rescue	10	56.9651	15.8465	0	0
R250H SYT Rescue	11	11.4303	2.26824	7.70416	5.8507
K379E SYT Rescue	10	25.9848	2.05782	0	0
S332L SYT Rescue	10	7.79663	1.81232	0.508475	0.361758
R334H SYT Rescue	10	3.29656	0.451022	18.6441	6.56924
eEJC Amplitude (nA) in 1.0 mM Calcium Conc.	n	mean(nA)	SEM(nA)	Failure Ratio(%)	SEM(%)
Null	8	1.54626	0.396791	40.8898	10.8122
WT SYT Rescue	9	49.4703	8.91312	0	0
R250H SYT Rescue	10	11.3195	1.54252	0	0
K379E SYT Rescue	12	24.8301	5.35633	0	0
S332L SYT Rescue	10	15.7358	4.06251	10.2986	8.15009
R334H SYT Rescue	10	4.18092	0.743173	11.676	5.50156
eEJC Amplitude (nA) in 2.0 mM Calcium Conc.	n	mean(nA)	SEM(nA)	Failure Ratio(%)	SEM(%)
Null	14	3.49692	0.564447	26.3296	8.57663
WT SYT Rescue	21	96.6326	9.82077	0	0
R250H SYT Rescue	20	41.1651	6.12193	0.645682	0.645682
K379E SYT Rescue	19	59.6784	5.5404	0	0
S332L SYT Rescue	17	15.0199	3.04476	0.20284	0.20284
R334H SYT Rescue	19	8.92587	1.06047	10.8893	6.23051
eEJC Amplitude (nA) in 4.0 mM Calcium Conc.	n	mean(nA)	SEM(nA)	Failure Ratio(%)	SEM(%)
Null	8	3.28371	0.549954	17.5847	5.04359
WT SYT Rescue	8	85.3445	14.9492	0	0
R250H SYT Rescue	6	45.1746	8.15616	0	0
K379E SYT Rescue	6	54.3448	12.6288	0	0
S332L SYT Rescue	10	22.1909	4.17794	0.338983	0.338983
R334H SYT Rescue	11	12.2096	1.90533	0	0
