# Supplementary material for: A synaptotagmin suppressor screen indicates SNARE binding controls the timing and Ca2+ cooperativity of vesicle fusion
Source: eLife. 2017 Sep 12;6:e28409. doi: 10.7554/eLife.28409 (PMC5617632; doi:10.7554/eLife.28409)
Supplement: Figure 8—source data 2. [file elife-28409-fig8-data2.xlsx]

## Sheet: Figure 8H Null data
Figure 8—source data 2
Sample size (n), mean, SEM, and Hill Fit of Null are presented for the data in Figures 8H.
Null	n	mean(nA)	SEM(nA)	Failure Ratio(%)	SEM(%)		Model	Hill
eEJC Amplitude (nA) in 0.1 mM Calcium Conc.	7	0.0654089	0.027302	94.9153	1.95712		Equation	y=Vmax*x^n/(k^n+x^n)
eEJC Amplitude (nA) in 0.175 mM Calcium Conc.	12	0.332209	0.0749903	75	5.46086		Reduced Chi-Sqr	0.103364
eEJC Amplitude (nA) in 0.25 mM Calcium Conc.	10	0.625791	0.12475	60.5085	6.69938		Adj. R-Square	0.926304
eEJC Amplitude (nA) in 0.3 mM Calcium Conc.	9	0.76066	0.164006	59.1337	7.93702				Value	Standard Error
eEJC Amplitude (nA) in 0.4 mM Calcium Conc.	9	0.699999	0.134472	58.1921	8.1677		Null	Vmax (maximum value at high Ca2+)	3.87715	0.607952
eEJC Amplitude (nA) in 0.6 mM Calcium Conc.	10	1.51183	0.224913	40.678	5.64406		Null	k (EC50)	0.900307	0.264128
eEJC Amplitude (nA) in 0.8 mM Calcium Conc.	15	1.87776	0.210756	33.7903	6.27748		Null	n (the cooperativity index)	1.50952	0.398119
eEJC Amplitude (nA) in 1.0 mM Calcium Conc.	8	1.54626	0.396791	40.8898	10.8122
eEJC Amplitude (nA) in 2.0 mM Calcium Conc.	14	3.49692	0.564447	26.3296	8.57663
eEJC Amplitude (nA) in 4.0 mM Calcium Conc.	8	3.28371	0.549954	17.5847	5.04359
