# Supplementary material for: A synaptotagmin suppressor screen indicates SNARE binding controls the timing and Ca2+ cooperativity of vesicle fusion
Source: eLife. 2017 Sep 12;6:e28409. doi: 10.7554/eLife.28409 (PMC5617632; doi:10.7554/eLife.28409)
Supplement: Figure 8—source data 3. [file elife-28409-fig8-data3.xlsx]

## Sheet: Figure 8H WT SYT Rescue data
Figure 8—source data 7
Sample size (n), mean, SEM, and Hill Fit of WT SYT Rescue are presented for the data in Figures 8H.
WT SYT Rescue	n	mean(nA)	SEM(nA)	Failure Ratio(%)	SEM(%)		Model	Hill
eEJC Amplitude (nA) in 0.1 mM Calcium Conc.	13	1.65235	0.648243	48.3703	9.82619		Equation	y=Vmax*x^n/(k^n+x^n)
eEJC Amplitude (nA) in 0.175 mM Calcium Conc.	11	2.02114	0.731325	38.6189	8.6742		Reduced Chi-Sqr	55.6589
eEJC Amplitude (nA) in 0.25 mM Calcium Conc.	11	3.16977	0.351391	11.094	4.74116		Adj. R-Square	0.957504
eEJC Amplitude (nA) in 0.3 mM Calcium Conc.	11	5.33203	1.10894	8.01233	4.28229				Value	Standard Error
eEJC Amplitude (nA) in 0.4 mM Calcium Conc.	11	10.2191	1.92896	7.08783	5.35403		WT SYT Rescue	Vmax (maximum value at high Ca2+)	92.3454	6.74646
eEJC Amplitude (nA) in 0.6 mM Calcium Conc.	14	26.5297	3.31601	0	0		WT SYT Rescue	k (EC50)	0.792631	0.0742466
eEJC Amplitude (nA) in 0.8 mM Calcium Conc.	10	56.9651	15.8465	0	0		WT SYT Rescue	n (the cooperativity index)	2.92201	0.695632
eEJC Amplitude (nA) in 1.0 mM Calcium Conc.	9	49.4703	8.91312	0	0
eEJC Amplitude (nA) in 2.0 mM Calcium Conc.	21	96.6326	9.82077	0	0
eEJC Amplitude (nA) in 4.0 mM Calcium Conc.	8	85.3445	14.9492	0	0
