# Supplementary material for: A synaptotagmin suppressor screen indicates SNARE binding controls the timing and Ca2+ cooperativity of vesicle fusion
Source: eLife. 2017 Sep 12;6:e28409. doi: 10.7554/eLife.28409 (PMC5617632; doi:10.7554/eLife.28409)
Supplement: Figure 8—source data 4. [file elife-28409-fig8-data4.xlsx]

## Sheet: Figure 8H R250H SYT Rescue data
Figure 8—source data 4
Sample size (n), mean, SEM, and Hill Fit of R250H SYT Rescue are presented for the data in Figures 8H.
R250H SYT Rescue	n	mean(nA)	SEM(nA)	Failure Ratio(%)	SEM(%)		Model	Hill
eEJC Amplitude (nA) in 0.1 mM Calcium Conc.	9	0.546792	0.181094	70.2448	9.30966		Equation	y=Vmax*x^n/(k^n+x^n)
eEJC Amplitude (nA) in 0.175 mM Calcium Conc.	13	0.539104	0.134808	63.459	6.56827		Reduced Chi-Sqr	16.3281
eEJC Amplitude (nA) in 0.25 mM Calcium Conc.	11	3.33051	0.659012	14.9461	4.78204		Adj. R-Square	0.938537
eEJC Amplitude (nA) in 0.3 mM Calcium Conc.	12	3.15584	0.315658	13.1356	4.2405				Value	Standard Error
eEJC Amplitude (nA) in 0.4 mM Calcium Conc.	10	5.3099	1.15407	10.339	4.58603		R250H SYT Rescue	Vmax (maximum value at high Ca2+)	52.201	8.44938
eEJC Amplitude (nA) in 0.6 mM Calcium Conc.	10	13.5002	3.58513	2.88136	1.92505		R250H SYT Rescue	k (EC50)	1.35883	0.332136
eEJC Amplitude (nA) in 0.8 mM Calcium Conc.	11	11.4303	2.26824	7.70416	5.8507		R250H SYT Rescue	n (the cooperativity index)	2.08287	0.584226
eEJC Amplitude (nA) in 1.0 mM Calcium Conc.	10	11.3195	1.54252	0	0
eEJC Amplitude (nA) in 2.0 mM Calcium Conc.	20	41.1651	6.12193	0.645682	0.645682
eEJC Amplitude (nA) in 4.0 mM Calcium Conc.	6	45.1746	8.15616	0	0
