# Supplementary material for: A synaptotagmin suppressor screen indicates SNARE binding controls the timing and Ca2+ cooperativity of vesicle fusion
Source: eLife. 2017 Sep 12;6:e28409. doi: 10.7554/eLife.28409 (PMC5617632; doi:10.7554/eLife.28409)
Supplement: Figure 8—source data 5. [file elife-28409-fig8-data5.xlsx]

## Sheet: Figure 8H K379E SYT Rescue data
Figure 8—source data 5
Sample size (n), mean, SEM, and Hill Fit of K379E SYT Rescue are presented for the data in Figures 8H.
K379E SYT Rescue	n	mean(nA)	SEM(nA)	Failure Ratio(%)	SEM(%)		Model	Hill
eEJC Amplitude (nA) in 0.1 mM Calcium Conc.	9	0.667968	0.376352	78.1544	10.1043		Equation	y=Vmax*x^n/(k^n+x^n)
eEJC Amplitude (nA) in 0.175 mM Calcium Conc.	12	2.04092	0.41638	28.2486	7.68917		Reduced Chi-Sqr	38.0513
eEJC Amplitude (nA) in 0.25 mM Calcium Conc.	12	2.75672	0.439752	16.3842	6.99869		Adj. R-Square	0.916782
eEJC Amplitude (nA) in 0.3 mM Calcium Conc.	15	6.59441	1.09468	3.38983	2.10528				Value	Standard Error
eEJC Amplitude (nA) in 0.4 mM Calcium Conc.	13	10.8178	1.58335	0	0		K379E SYT Rescue	Vmax (maximum value at high Ca2+)	61.5241	8.62534
eEJC Amplitude (nA) in 0.6 mM Calcium Conc.	10	28.3945	3.57371	0	0		K379E SYT Rescue	k (EC50)	0.887686	0.2026
eEJC Amplitude (nA) in 0.8 mM Calcium Conc.	10	25.9848	2.05782	0	0		K379E SYT Rescue	n (the cooperativity index)	1.93184	0.580283
eEJC Amplitude (nA) in 1.0 mM Calcium Conc.	12	24.8301	5.35633	0	0
eEJC Amplitude (nA) in 2.0 mM Calcium Conc.	19	59.6784	5.5404	0	0
eEJC Amplitude (nA) in 4.0 mM Calcium Conc.	6	54.3448	12.6288	0	0
