# Supplementary material for: A synaptotagmin suppressor screen indicates SNARE binding controls the timing and Ca2+ cooperativity of vesicle fusion
Source: eLife. 2017 Sep 12;6:e28409. doi: 10.7554/eLife.28409 (PMC5617632; doi:10.7554/eLife.28409)
Supplement: Figure 8—source data 6. [file elife-28409-fig8-data6.xlsx]

## Sheet: Figure 8H S332L SYT Rescue data
Figure 8—source data 6
Sample size (n), mean, SEM, and Hill Fit of S332L SYT Rescue are presented for the data in Figures 8H.
S332L SYT Rescue	n	mean(nA)	SEM(nA)	Failure Ratio(%)	SEM(%)		Model	Hill
eEJC Amplitude (nA) in 0.1 mM Calcium Conc.	9	0.130286	0.0431484	91.7137	2.50195		Equation	y=Vmax*x^n/(k^n+x^n)
eEJC Amplitude (nA) in 0.175 mM Calcium Conc.	13	0.381198	0.0775263	75.6193	4.6912		Reduced Chi-Sqr	4.93939
eEJC Amplitude (nA) in 0.25 mM Calcium Conc.	13	0.787421	0.110565	49.4133	5.09143		Adj. R-Square	0.916759
eEJC Amplitude (nA) in 0.3 mM Calcium Conc.	10	2.94671	0.575223	21.5254	6.07995				Value	Standard Error
eEJC Amplitude (nA) in 0.4 mM Calcium Conc.	9	3.7581	0.684901	9.79284	2.70624		S332L SYT Rescue	Vmax (maximum value at high Ca2+)	22.0096	3.19744
eEJC Amplitude (nA) in 0.6 mM Calcium Conc.	11	4.44997	1.29223	13.5273	3.70647		S332L SYT Rescue	k (EC50)	0.945073	0.219232
eEJC Amplitude (nA) in 0.8 mM Calcium Conc.	10	7.79663	1.81232	0.508475	0.361758		S332L SYT Rescue	n (the cooperativity index)	1.99462	0.623412
eEJC Amplitude (nA) in 1.0 mM Calcium Conc.	10	15.7358	4.06251	10.2986	8.15009
eEJC Amplitude (nA) in 2.0 mM Calcium Conc.	17	15.0199	3.04476	0.20284	0.20284
eEJC Amplitude (nA) in 4.0 mM Calcium Conc.	10	22.1909	4.17794	0.338983	0.338983
