# Supplementary material for: A synaptotagmin suppressor screen indicates SNARE binding controls the timing and Ca2+ cooperativity of vesicle fusion
Source: eLife. 2017 Sep 12;6:e28409. doi: 10.7554/eLife.28409 (PMC5617632; doi:10.7554/eLife.28409)
Supplement: Figure 8—source data 7. [file elife-28409-fig8-data7.xlsx]

## Sheet: Figure 8H R334H SYT Rescue data
Figure 8—source data 7
Sample size (n), mean, SEM, and Hill Fit of R334H SYT Rescue are presented for the data in Figures 8H.
R334H SYT Rescue	n	mean(nA)	SEM(nA)	Failure Ratio(%)	SEM(%)		Model	Hill
eEJC Amplitude (nA) in 0.1 mM Calcium Conc.	8	0.116677	0.049387	92.161	2.96934		Equation	y=Vmax*x^n/(k^n+x^n)
eEJC Amplitude (nA) in 0.175 mM Calcium Conc.	10	0.383649	0.119577	71.5254	8.33329		Reduced Chi-Sqr	0.17871
eEJC Amplitude (nA) in 0.25 mM Calcium Conc.	14	1.17888	0.159381	37.7724	5.86444		Adj. R-Square	0.988693
eEJC Amplitude (nA) in 0.3 mM Calcium Conc.	10	0.713953	0.195191	65.5932	6.94272				Value	Standard Error
eEJC Amplitude (nA) in 0.4 mM Calcium Conc.	11	2.05715	0.506386	40.3698	10.0528		R334H SYT Rescue	Vmax (maximum value at high Ca2+)	16.6465	2.24335
eEJC Amplitude (nA) in 0.6 mM Calcium Conc.	9	3.07797	0.587038	23.1638	7.60616		R334H SYT Rescue	k (EC50)	1.92849	0.441957
eEJC Amplitude (nA) in 0.8 mM Calcium Conc.	10	3.29656	0.451022	18.6441	6.56924		R334H SYT Rescue	n (the cooperativity index)	1.43327	0.174461
eEJC Amplitude (nA) in 1.0 mM Calcium Conc.	10	4.18092	0.743173	11.676	5.50156
eEJC Amplitude (nA) in 2.0 mM Calcium Conc.	19	8.92587	1.06047	10.8893	6.23051
eEJC Amplitude (nA) in 4.0 mM Calcium Conc.	11	12.2096	1.90533	0	0
