# Supplementary material for: A synaptotagmin suppressor screen indicates SNARE binding controls the timing and Ca2+ cooperativity of vesicle fusion
Source: eLife. 2017 Sep 12;6:e28409. doi: 10.7554/eLife.28409 (PMC5617632; doi:10.7554/eLife.28409)
Supplement: Figure 8—source data 8. [file elife-28409-fig8-data8.xlsx]

## Sheet: Figure8H Regression Analysidata
Figure 8—source data 8
Regression Analysis are presented for the data in Figures 8H.
Summary of Regression Model Results: compared to SYT Null
Dependent Variable: log__eEJC-Amp (log_Calcium concentration: 0.3mM, 0.4mM, 0.6mM, 0.8mM)
# Samples	258
Regression Analysis	Coefficient estimates (P-values)	p-values	Adjusted P Value	Summary
interaction WT SYT Rescue^ SYT Null	1.669 (0.000)	0	<0.0001	****
interaction R250H SYT Rescue ^ SYT Null	0.304 (0.473)	0.473	> 0.9999	ns
interaction K379E SYT Rescue ^ SYT Null	0.906 (0.030)	0.03	0.3	ns
interaction S332L SYT Rescue ^ SYT Null	0.058 (0.893)	0.893	> 0.9999	ns
interaction R334H SYT Rescue ^ SYT Null	1.087 (0.013)	0.013	0.13	ns
Summary of Regression Model Results: compared to WT SYT Rescue
Dependent Variable: log__eEJC-Amp (log_Calcium concentration: 0.3mM, 0.4mM, 0.6mM, 0.8mM)
# Samples	217
Regression Analysis	Coefficient estimates (P-values)	p-values	Adjusted P Value	Summary
interaction R250H SYT Rescue ^ WT SYT Rescue	-1.365 (0.002)	0.002	0.02	*
interaction K379E SYT Rescue ^ WT SYT Rescue	-0.763 (0.070)	0.07	0.7	ns
interaction S332L SYT Rescue ^ WT SYT Rescue	-1.61 (0.000)	0	<0.0001	****
interaction R334H SYT Rescue ^ WT SYT Rescue	-0.582 (0.185)	0.185	> 0.9999	ns
Summary of Regression Model Results: R334H SYT Rescue compared to S332L SYT Rescue
Dependent Variable: log__eEJC-Amp (log_Calcium concentration: 0.3mM, 0.4mM, 0.6mM, 0.8mM)
# Samples	80
Regression Analysis	Coefficient estimates (P-values)	p-values	Adjusted P Value	Summary
interaction R334H SYT Rescue ^ S332L SYT Rescue	1.028 (0.042)	0.042	0.4	ns
