# Supplementary material for: A synaptotagmin suppressor screen indicates SNARE binding controls the timing and Ca2+ cooperativity of vesicle fusion
Source: eLife. 2017 Sep 12;6:e28409. doi: 10.7554/eLife.28409 (PMC5617632; doi:10.7554/eLife.28409)
Supplement: Figure 9—source data 1. [file elife-28409-fig9-data1.xlsx]

## Sheet: Figure 9 source data
Figure 9—source data 1
Figure 9—source data 1
Sample size (n), mean, SEM, and One-way Anova (and nonparametric) Sidak's multiple comparisons test are presented for the data in Figures 9B
Figure9-B (Vesicle number near T bar)
Vesicle number near T-bar (#)	n	mean	SEM
Null	24	0.583333	0.158305
WT SYT Rescue	20	1.5	0.135724
R250H SYT Rescue	30	1.3	0.118903
S332L SYT Rescue	21	1.28571	0.122336
R334H SYT Rescue	29	1.06897	0.110206
K379E SYT Rescue	23	1.30435	0.15948
Vesicle number near T-bar	Adjusted P Value	Summary
Sidak's multiple comparisons test	(One-way ANOVA)
Null vs. WT SYT Rescue	< 0.0001	****
Null vs. R250H SYT Rescue	0.0011	**
Null vs. S332L SYT Rescue	0.0049	**
Null vs. R334H SYT Rescue	0.0777	ns
Null vs. K379E SYT Rescue	0.0026	**
WT SYT Rescue vs. R250H SYT Rescue	0.9589	ns
WT SYT Rescue vs. S332L SYT Rescue	0.9614	ns
WT SYT Rescue vs. R334H SYT Rescue	0.2189	ns
WT SYT Rescue vs. K379E SYT Rescue	0.9752	ns
Figure9-B (Vesicle number within 100 nm)
Vesicle number within 100 nm (#)	n	mean	SEM
Null	24	2.25	0.395857
WT SYT Rescue	20	4.2	0.186378
R250H SYT Rescue	32	3.34375	0.290474
S332L SYT Rescue	21	3.95238	0.288479
R334H SYT Rescue	29	3.86207	0.202959
K379E SYT Rescue	23	3.21739	0.251136
Vesicle number within 100 nm	Adjusted P Value	Summary
Sidak's multiple comparisons test	(One-way ANOVA)
Null vs. WT SYT Rescue	< 0.0001	****
Null vs. R250H SYT Rescue	0.0396	*
Null vs. S332L SYT Rescue	0.0007	***
Null vs. R334H SYT Rescue	0.0005	***
Null vs. K379E SYT Rescue	0.1618	ns
WT SYT Rescue vs. R250H SYT Rescue	0.2667	ns
WT SYT Rescue vs. S332L SYT Rescue	0.9995	ns
WT SYT Rescue vs. R334H SYT Rescue	0.9911	ns
WT SYT Rescue vs. K379E SYT Rescue	0.1918	ns
Figure9-B (Vesicle number within 100-150 nm)
Vesicle number within 100-150 nm (#)	n	mean	SEM
Null	24	4	0.535006
WT SYT Rescue	20	6.85	0.471699
R250H SYT Rescue	32	5.375	0.286631
S332L SYT Rescue	21	5.85714	0.346999
R334H SYT Rescue	29	4.96552	0.327262
K379E SYT Rescue	23	3.65217	0.400635
Vesicle number within 100-150 nm	Adjusted P Value	Summary
Sidak's multiple comparisons test	(One-way ANOVA)
Null vs. WT SYT Rescue	< 0.0001	****
Null vs. R250H SYT Rescue	0.0858	ns
Null vs. S332L SYT Rescue	0.0156	*
Null vs. R334H SYT Rescue	0.5024	ns
Null vs. K379E SYT Rescue	0.9991	ns
WT SYT Rescue vs. R250H SYT Rescue	0.0765	ns
WT SYT Rescue vs. S332L SYT Rescue	0.6318	ns
WT SYT Rescue vs. R334H SYT Rescue	0.01	**
WT SYT Rescue vs. K379E SYT Rescue	< 0.0001	****
Figure9-B (Vesicle number within 150-200 nm)
Vesicle number within 150-200 nm (#)	n	mean	SEM
Null	24	3.08333	0.527905
WT SYT Rescue	20	7.85	0.544228
R250H SYT Rescue	32	5.53125	0.378304
S332L SYT Rescue	21	7.61905	0.428042
R334H SYT Rescue	29	7.27586	0.510714
K379E SYT Rescue	23	4.34783	0.524531
Vesicle number within 150-200 nm	Adjusted P Value	Summary
Sidak's multiple comparisons test	(One-way ANOVA)
Null vs. WT SYT Rescue	< 0.0001	****
Null vs. R250H SYT Rescue	0.0022	**
Null vs. S332L SYT Rescue	< 0.0001	****
Null vs. R334H SYT Rescue	< 0.0001	****
Null vs. K379E SYT Rescue	0.5501	ns
WT SYT Rescue vs. R250H SYT Rescue	0.0086	**
WT SYT Rescue vs. S332L SYT Rescue	> 0.9999	ns
WT SYT Rescue vs. R334H SYT Rescue	0.9919	ns
WT SYT Rescue vs. K379E SYT Rescue	< 0.0001	****
Figure9-B (Vesicle number sum)
Vesicle number sum (#) within 200 nm	n	mean	SEM
Null	24	9.33333	1.23896
WT SYT Rescue	20	18.9	0.870269
R250H SYT Rescue	32	14.25	0.631818
S332L SYT Rescue	21	17.4286	0.674613
R334H SYT Rescue	29	16.1034	0.675658
K379E SYT Rescue	23	11.2174	0.915299
Vesicle number sum within 200 nm	Adjusted P Value	Summary
Sidak's multiple comparisons test	(One-way ANOVA)
Null vs. WT SYT Rescue	< 0.0001	****
Null vs. R250H SYT Rescue	0.0002	***
Null vs. S332L SYT Rescue	< 0.0001	****
Null vs. R334H SYT Rescue	< 0.0001	****
Null vs. K379E SYT Rescue	0.7024	ns
WT SYT Rescue vs. R250H SYT Rescue	0.0014	**
WT SYT Rescue vs. S332L SYT Rescue	0.9362	ns
WT SYT Rescue vs. R334H SYT Rescue	0.1911	ns
WT SYT Rescue vs. K379E SYT Rescue	< 0.0001	****
