# Supplementary material for: A synaptotagmin suppressor screen indicates SNARE binding controls the timing and Ca2+ cooperativity of vesicle fusion
Source: eLife. 2017 Sep 12;6:e28409. doi: 10.7554/eLife.28409 (PMC5617632; doi:10.7554/eLife.28409)
Supplement: Figure 9—source data 2. [file elife-28409-fig9-data2.xlsx]

## Sheet: Sheet1
Figure 9—source data 2
Sample size (n), mean, SEM, and One-way Anova (and nonparametric) Sidak's multiple comparisons test are presented for the data in Figures 9C
Figure9-C (Vesicle density per µm²)
Vesicle density per µm²	n	mean	SEM
Null	14	38.738	7.47455
WT SYT Rescue	31	163.988	7.34559
R250H SYT Rescue	38	89.7081	6.63029
S332L SYT Rescue	18	177.325	11.1315
R334H SYT Rescue	35	119.994	6.86335
K379E SYT Rescue	20	79.6195	8.00461
Vesicle density per µm²	Adjusted P Value	Summary
Sidak's multiple comparisons test	(One-way ANOVA)
Null vs. WT SYT Rescue	< 0.0001	****
Null vs. R250H SYT Rescue	0.0007	***
Null vs. S332L SYT Rescue	< 0.0001	****
Null vs. R334H SYT Rescue	< 0.0001	****
Null vs. K379E SYT Rescue	0.0347	*
WT SYT Rescue vs. R250H SYT Rescue	< 0.0001	****
WT SYT Rescue vs. S332L SYT Rescue	0.9357	ns
WT SYT Rescue vs. R334H SYT Rescue	0.0001	***
WT SYT Rescue vs. K379E SYT Rescue	< 0.0001	****
