# Supplementary material for: A synaptotagmin suppressor screen indicates SNARE binding controls the timing and Ca2+ cooperativity of vesicle fusion
Source: eLife. 2017 Sep 12;6:e28409. doi: 10.7554/eLife.28409 (PMC5617632; doi:10.7554/eLife.28409)
Supplement: Figure 9—source data 3. [file elife-28409-fig9-data3.xlsx]

## Sheet: Figure 9-fig supplement 1
Figure 9-source data 3
Sample size (n), mean, SEM, and One-way Anova (and nonparametric) Sidak's multiple comparisons test are presented for the data in Figures 9-figure supplement 1
Figures 9-figure supplement 1 C
FM 1-43 dye fluorescence (AU) 0.5 min 10Hz	n	mean	SEM
Null	22	5154	542.9
WT SYT Rescue	13	12677	1262
R250H SYT Rescue	14	6460	850.7
K379E SYT Rescue	16	8324	1764
FM 1-43 dye fluorescence (AU) 0.5 min 10Hz	Adjusted P Value	Summary
Sidak's multiple comparisons test	(One-way ANOVA)
Null vs. WT SYT Rescue	< 0.0001	****
Null vs. R250H SYT Rescue	0.9015	ns
Null vs. K379E SYT Rescue	0.1209	ns
WT SYT Rescue vs. R250H SYT Rescue	0.0013	**
WT SYT Rescue vs. K379E SYT Rescue	0.0358	*
FM 1-43 dye fluorescence (AU) 1 min 10Hz	n	mean	SEM
Null	10	8229	1332
WT SYT Rescue	11	13636	932.7
R250H SYT Rescue	7	9115	1262
K379E SYT Rescue	10	8372	1203
FM 1-43 dye fluorescence (AU) 1 min 10Hz	Adjusted P Value	Summary
Sidak's multiple comparisons test	(One-way ANOVA)
Null vs. WT SYT Rescue	0.0222	*
Null vs. R250H SYT Rescue	0.9963	ns
Null vs. K379E SYT Rescue	> 0.9999	ns
WT SYT Rescue vs. R250H SYT Rescue	0.1423	ns
WT SYT Rescue vs. K379E SYT Rescue	0.0277	*
Figures 9-figure supplement 1 D
RRP (quanta)	n	mean	SEM
Null	5	2583.9	400.8
WT SYT Rescue	4	39322.6	12343.3
R250H SYT Rescue	6	15034.3	3243.7
K379E SYT Rescue	5	10635.7	3405.9
RRP (quanta)	Adjusted P Value	Summary
Sidak's multiple comparisons test	(One-way ANOVA)
Null vs. WT SYT Rescue	0.0018	**
Null vs. R250H SYT Rescue	0.4452	ns
Null vs. K379E SYT Rescue	0.8458	ns
WT SYT Rescue vs. R250H SYT Rescue	0.0349	*
WT SYT Rescue vs. K379E SYT Rescue	0.0145	*
Figures 9-figure supplement 1 E
quanta	n	mean	SEM
Null	5	16.1	2.6
WT SYT Rescue	4	158.3	47
R250H SYT Rescue	6	43.4	10.1
K379E SYT Rescue	5	53.5	21
quanta	Adjusted P Value	Summary
Sidak's multiple comparisons test	(One-way ANOVA)
Null vs. WT SYT Rescue	0.0026	**
Null vs. R250H SYT Rescue	0.9015	ns
Null vs. K379E SYT Rescue	0.7549	ns
WT SYT Rescue vs. R250H SYT Rescue	0.0113	*
WT SYT Rescue vs. K379E SYT Rescue	0.0287	*
