# Supplementary material for: A synaptotagmin suppressor screen indicates SNARE binding controls the timing and Ca2+ cooperativity of vesicle fusion
Source: eLife. 2017 Sep 12;6:e28409. doi: 10.7554/eLife.28409 (PMC5617632; doi:10.7554/eLife.28409)
Supplement: Source data 1. [file elife-28409-data1.xlsx]

## Sheet: Figure 1 and 2 source data
Figure 1 and Figure 2—source data 1-2
Figure 1 and Figure 2—source data 1
Sample size (n), mean, SEM, and One-way Anova (and nonparametric) Sidak's multiple comparisons test are presented for the data in Figures 1C and Figure 2C,2G,2K and 2O.
eEJC Amplitude (nA)	n	mean	SEM
Control	27	115.985	8.69607
OE WT SYT	24	94.9592	9.35476
OE D1,2N SYT	10	15.8815	3.45839
OE D1,2N SYT R250H	15	105.517	7.4581
OE D1,2N SYT K379E	10	57.6659	7.28809
OE D1,2N SYT P363S	7	49.5857	11.2392
OE D1,2N SYT S332L	13	56.568	7.01753
OE D1,2N SYT R334H	7	122.934	7.81924
eEJC Amplitude (nA)	Adjusted P Value	Summary
Sidak's multiple comparisons test	(One-way ANOVA)
Control vs. OE WT SYT	0.4241	ns
Control vs. OE D1,2N SYT	< 0.0001	****
Control vs. OE D1,2N SYT R250H	0.9983	ns
Control vs. OE D1,2N SYT K379E	0.0004	***
Control vs. OE D1,2N SYT P363S	0.0004	***
Control vs. OE D1,2N SYT S332L	< 0.0001	****
Control vs. OE D1,2N SYT R334H	> 0.9999	ns
OE WT SYT vs. OE D1,2N SYT	< 0.0001	****
OE D1,2N SYT vs. OE D1,2N SYT R250H	< 0.0001	****
OE D1,2N SYT vs. OE D1,2N SYT K379E	0.1356	ns
OE D1,2N SYT vs. OE D1,2N SYT P363S	0.5714	ns
OE D1,2N SYT vs. OE D1,2N SYT S332L	0.1066	ns
OE D1,2N SYT vs. OE D1,2N SYT R334H	< 0.0001	****
OE D1,2N SYT S332L vs. OE D1,2N SYT R334H	0.0019	**
Figure 1 and Figure 2—source data 2
Sample size (n), mean, SEM, and One-way Anova (and nonparametric) Sidak's multiple comparisons test are presented for the data in Figures 1E and Figure 2D,2H,2L and 2P.
mini Frequency (Hz)	n	mean	SEM
Control	19	2.57038	0.261136
OE WT SYT	9	2.70573	0.460833
OE D1,2N SYT	15	5.74309	0.846365
OE D1,2N SYT R250H	21	4.09994	0.558685
OE D1,2N SYT K379E	11	5.475	0.383544
OE D1,2N SYT P363S	10	5.05576	0.277864
OE D1,2N SYT S332L	12	5.70795	0.622189
OE D1,2N SYT R334H	7	4.54444	0.503181
mini Frequency (Hz)	Adjusted P Value	Summary
Sidak's multiple comparisons test	(One-way ANOVA)
Control vs. OE WT SYT	> 0.9999	ns
Control vs. OE D1,2N SYT	0.0003	***
Control vs. OE D1,2N SYT R250H	0.254	ns
Control vs. OE D1,2N SYT K379E	0.0045	**
Control vs. OE D1,2N SYT P363S	0.0353	*
Control vs. OE D1,2N SYT S332L	0.001	**
Control vs. OE D1,2N SYT R334H	0.3674	ns
OE WT SYT vs. OE D1,2N SYT	0.0096	**
OE D1,2N SYT vs. OE D1,2N SYT R250H	0.246	ns
OE D1,2N SYT vs. OE D1,2N SYT K379E	> 0.9999	ns
OE D1,2N SYT vs. OE D1,2N SYT P363S	0.9994	ns
OE D1,2N SYT vs. OE D1,2N SYT S332L	> 0.9999	ns
OE D1,2N SYT vs. OE D1,2N SYT R334H	0.96	ns
OE D1,2N SYT S332L vs. OE D1,2N SYT R334H	0.9772	ns

## Sheet: Figure 3-6-8 source data
Figure 3, Figure 6 and Figure 8—source data 3-6
Figure 3, Figure 6 and Figure 8—source data 3
Sample size (n), mean, SEM, and One-way Anova (and nonparametric) Sidak's multiple comparisons test are presented for the data in Figures 3B, Figure 6B and Figure 8B.
eEJC Amplitude (nA)	n	mean	SEM
Null	11	3.5119	0.446305
WT SYT Rescue	12	109.706	11.4964
R250H SYT Rescue	15	44.1229	6.76494
P363S SYT Rescue	20	9.7597	1.65817
K379E SYT Rescue	20	57.3489	4.86791
S332L SYT Rescue	17	14.8727	3.02828
R334H SYT Rescue	16	8.83043	0.896462
eEJC Amplitude (nA)	Adjusted P Value	Summary
Sidak's multiple comparisons test	(One-way ANOVA)
Null vs. WT SYT Rescue	< 0.0001	****
Null vs. R250H SYT Rescue	< 0.0001	****
Null vs. P363S SYT Rescue	0.9977	ns
Null vs. K379E SYT Rescue	< 0.0001	****
Null vs. S332L SYT Rescue	0.8282	ns
Null vs. R334H SYT Rescue	0.9997	ns
WT SYT Rescue vs. R250H SYT Rescue	< 0.0001	****
WT SYT Rescue vs. P363S SYT Rescue	< 0.0001	****
WT SYT Rescue vs. K379E SYT Rescue	< 0.0001	****
WT SYT Rescue vs. S332L SYT Rescue	< 0.0001	****
WT SYT Rescue vs. R334H SYT Rescue	< 0.0001	****
S332L SYT Rescue vs. R334H SYT Rescue	0.9966	ns
Figure 3, Figure 6 and Figure 8—source data 4
Sample size (n), mean, SEM, and One-way Anova (and nonparametric) Sidak's multiple comparisons test are presented for the data in Figures 3E, Figure 6E and Figure 8E.
Synchr. Component (% of total Release)	n	mean(%)	SEM(%)
Null	11	33.6818	2.06736
WT SYT Rescue	12	95.6167	0.89365
R250H SYT Rescue	15	83.9669	2.18265
P363S SYT Rescue	20	76.785	3.19628
K379E SYT Rescue	20	91.8	1.1323
S332L SYT Rescue	17	71.2941	2.91013
R334H SYT Rescue	16	58.25	4.01922
Synchr. Component (% of total Release)	Adjusted P Value	Summary
Sidak's multiple comparisons test	(One-way ANOVA)
Null vs. WT SYT Rescue	< 0.0001	****
Null vs. R250H SYT Rescue	< 0.0001	****
Null vs. P363S SYT Rescue	< 0.0001	****
Null vs. K379E SYT Rescue	< 0.0001	****
Null vs. S332L SYT Rescue	< 0.0001	****
Null vs. R334H SYT Rescue	< 0.0001	****
WT SYT Rescue vs. R250H SYT Rescue	0.0736	ns
WT SYT Rescue vs. P363S SYT Rescue	< 0.0001	****
WT SYT Rescue vs. K379E SYT Rescue	0.9926	ns
WT SYT Rescue vs. S332L SYT Rescue	< 0.0001	****
WT SYT Rescue vs. R334H SYT Rescue	< 0.0001	****
S332L SYT Rescue vs. R334H SYT Rescue	0.0091	**
Figure 3, Figure 6 and Figure 8—source data 5
Sample size (n), mean, SEM, and One-way Anova (and nonparametric) Sidak's multiple comparisons test are presented for the data in Figures 3F, Figure 6F and Figure 8F.
Asynchr. Component (% of total Release)	n	mean(%)	SEM(%)
Null	11	66.3182	2.06736
WT SYT Rescue	12	4.38333	0.89365
R250H SYT Rescue	15	16.0331	2.18265
P363S SYT Rescue	20	23.215	3.19628
K379E SYT Rescue	20	8.2	1.1323
S332L SYT Rescue	17	28.7059	2.91013
R334H SYT Rescue	16	41.75	4.01922
Asynchr. Component (% of total Release)	Adjusted P Value	Summary
Sidak's multiple comparisons test	(One-way ANOVA)
Null vs. WT SYT Rescue	< 0.0001	****
Null vs. R250H SYT Rescue	< 0.0001	****
Null vs. P363S SYT Rescue	< 0.0001	****
Null vs. K379E SYT Rescue	< 0.0001	****
Null vs. S332L SYT Rescue	< 0.0001	****
Null vs. R334H SYT Rescue	< 0.0001	****
WT SYT Rescue vs. R250H SYT Rescue	0.0736	ns
WT SYT Rescue vs. P363S SYT Rescue	< 0.0001	****
WT SYT Rescue vs. K379E SYT Rescue	0.9926	ns
WT SYT Rescue vs. S332L SYT Rescue	< 0.0001	****
WT SYT Rescue vs. R334H SYT Rescue	< 0.0001	****
S332L SYT Rescue vs. R334H SYT Rescue	0.0091	**
Figure 3, Figure 6 and Figure 8—source data 6
Sample size (n), mean, SEM, and One-way Anova (and nonparametric) Sidak's multiple comparisons test are presented for the data in Figures 3G, Figure 6G and Figure 8G.
mini Frequency (Hz)	n	mean	SEM
Null	23	4.24901	0.278759
WT SYT Rescue	20	1.63155	0.214452
R250H SYT Rescue	25	6.68563	0.252061
P363S SYT Rescue	21	2.36395	0.245298
K379E SYT Rescue	23	3.95495	0.347185
S332L SYT Rescue	15	3.34422	0.381383
R334H SYT Rescue	15	8.25833	0.543588
mini Frequency (Hz)	Adjusted P Value	Summary
Sidak's multiple comparisons test	(One-way ANOVA)
Null vs. WT SYT Rescue	< 0.0001	****
Null vs. R250H SYT Rescue	< 0.0001	****
Null vs. P363S SYT Rescue	0.0004	***
Null vs. K379E SYT Rescue	0.9997	ns
Null vs. S332L SYT Rescue	0.5509	ns
Null vs. R334H SYT Rescue	< 0.0001	****
WT SYT Rescue vs. R250H SYT Rescue	< 0.0001	****
WT SYT Rescue vs. P363S SYT Rescue	0.7573	ns
WT SYT Rescue vs. K379E SYT Rescue	< 0.0001	****
WT SYT Rescue vs. S332L SYT Rescue	0.0096	**
WT SYT Rescue vs. R334H SYT Rescue	< 0.0001	****
S332L SYT Rescue vs. R334H SYT Rescue	< 0.0001	****

## Sheet: Figure 8H source data
Figure 8—source data 7
Sample size (n), mean, SEM are presented for the data in Figures 8H.
eEJC Amplitude (nA) in 0.1 mM Calcium Conc.	n	mean(nA)	SEM(nA)	Failure Ratio(%)	SEM(%)
Null	7	0.0654089	0.027302	94.9153	1.95712
WT SYT Rescue	13	1.65235	0.648243	48.3703	9.82619
R250H SYT Rescue	9	0.546792	0.181094	70.2448	9.30966
K379E SYT Rescue	9	0.667968	0.376352	78.1544	10.1043
S332L SYT Rescue	9	0.130286	0.0431484	91.7137	2.50195
R334H SYT Rescue	8	0.116677	0.049387	92.161	2.96934
eEJC Amplitude (nA) in 0.175 mM Calcium Conc.	n	mean(nA)	SEM(nA)	Failure Ratio(%)	SEM(%)
Null	12	0.332209	0.0749903	75	5.46086
WT SYT Rescue	11	2.02114	0.731325	38.6189	8.6742
R250H SYT Rescue	13	0.539104	0.134808	63.459	6.56827
K379E SYT Rescue	12	2.04092	0.41638	28.2486	7.68917
S332L SYT Rescue	13	0.381198	0.0775263	75.6193	4.6912
R334H SYT Rescue	10	0.383649	0.119577	71.5254	8.33329
eEJC Amplitude (nA) in 0.25 mM Calcium Conc.	n	mean(nA)	SEM(nA)	Failure Ratio(%)	SEM(%)
Null	10	0.625791	0.12475	60.5085	6.69938
WT SYT Rescue	11	3.16977	0.351391	11.094	4.74116
R250H SYT Rescue	11	3.33051	0.659012	14.9461	4.78204
K379E SYT Rescue	12	2.75672	0.439752	16.3842	6.99869
S332L SYT Rescue	13	0.787421	0.110565	49.4133	5.09143
R334H SYT Rescue	14	1.17888	0.159381	37.7724	5.86444
eEJC Amplitude (nA) in 0.3 mM Calcium Conc.	n	mean(nA)	SEM(nA)	Failure Ratio(%)	SEM(%)
Null	9	0.76066	0.164006	59.1337	7.93702
WT SYT Rescue	11	5.33203	1.10894	8.01233	4.28229
R250H SYT Rescue	12	3.15584	0.315658	13.1356	4.2405
K379E SYT Rescue	15	6.59441	1.09468	3.38983	2.10528
S332L SYT Rescue	10	2.94671	0.575223	21.5254	6.07995
R334H SYT Rescue	10	0.713953	0.195191	65.5932	6.94272
eEJC Amplitude (nA) in 0.4 mM Calcium Conc.	n	mean(nA)	SEM(nA)	Failure Ratio(%)	SEM(%)
Null	9	0.699999	0.134472	58.1921	8.1677
WT SYT Rescue	11	10.2191	1.92896	7.08783	5.35403
R250H SYT Rescue	10	5.3099	1.15407	10.339	4.58603
K379E SYT Rescue	13	10.8178	1.58335	0	0
S332L SYT Rescue	9	3.7581	0.684901	9.79284	2.70624
R334H SYT Rescue	11	2.05715	0.506386	40.3698	10.0528
eEJC Amplitude (nA) in 0.6 mM Calcium Conc.	n	mean(nA)	SEM(nA)	Failure Ratio(%)	SEM(%)
Null	10	1.51183	0.224913	40.678	5.64406
WT SYT Rescue	14	26.5297	3.31601	0	0
R250H SYT Rescue	10	13.5002	3.58513	2.88136	1.92505
K379E SYT Rescue	10	28.3945	3.57371	0	0
S332L SYT Rescue	11	4.44997	1.29223	13.5273	3.70647
R334H SYT Rescue	9	3.07797	0.587038	23.1638	7.60616
eEJC Amplitude (nA) in 0.8 mM Calcium Conc.	n	mean(nA)	SEM(nA)	Failure Ratio(%)	SEM(%)
Null	15	1.87776	0.210756	33.7903	6.27748
WT SYT Rescue	10	56.9651	15.8465	0	0
R250H SYT Rescue	11	11.4303	2.26824	7.70416	5.8507
K379E SYT Rescue	10	25.9848	2.05782	0	0
S332L SYT Rescue	10	7.79663	1.81232	0.508475	0.361758
R334H SYT Rescue	10	3.29656	0.451022	18.6441	6.56924
eEJC Amplitude (nA) in 1.0 mM Calcium Conc.	n	mean(nA)	SEM(nA)	Failure Ratio(%)	SEM(%)
Null	8	1.54626	0.396791	40.8898	10.8122
WT SYT Rescue	9	49.4703	8.91312	0	0
R250H SYT Rescue	10	11.3195	1.54252	0	0
K379E SYT Rescue	12	24.8301	5.35633	0	0
S332L SYT Rescue	10	15.7358	4.06251	10.2986	8.15009
R334H SYT Rescue	10	4.18092	0.743173	11.676	5.50156
eEJC Amplitude (nA) in 2.0 mM Calcium Conc.	n	mean(nA)	SEM(nA)	Failure Ratio(%)	SEM(%)
Null	14	3.49692	0.564447	26.3296	8.57663
WT SYT Rescue	21	96.6326	9.82077	0	0
R250H SYT Rescue	20	41.1651	6.12193	0.645682	0.645682
K379E SYT Rescue	19	59.6784	5.5404	0	0
S332L SYT Rescue	17	15.0199	3.04476	0.20284	0.20284
R334H SYT Rescue	19	8.92587	1.06047	10.8893	6.23051
eEJC Amplitude (nA) in 4.0 mM Calcium Conc.	n	mean(nA)	SEM(nA)	Failure Ratio(%)	SEM(%)
Null	8	3.28371	0.549954	17.5847	5.04359
WT SYT Rescue	8	85.3445	14.9492	0	0
R250H SYT Rescue	6	45.1746	8.15616	0	0
K379E SYT Rescue	6	54.3448	12.6288	0	0
S332L SYT Rescue	10	22.1909	4.17794	0.338983	0.338983
R334H SYT Rescue	11	12.2096	1.90533	0	0

## Sheet: Figure 8H Null data
Figure 8—source data 7
Sample size (n), mean, SEM, and Hill Fit of Null are presented for the data in Figures 8H.
Null	n	mean(nA)	SEM(nA)	Failure Ratio(%)	SEM(%)		Model	Hill
eEJC Amplitude (nA) in 0.1 mM Calcium Conc.	7	0.0654089	0.027302	94.9153	1.95712		Equation	y=Vmax*x^n/(k^n+x^n)
eEJC Amplitude (nA) in 0.175 mM Calcium Conc.	12	0.332209	0.0749903	75	5.46086		Reduced Chi-Sqr	0.103364
eEJC Amplitude (nA) in 0.25 mM Calcium Conc.	10	0.625791	0.12475	60.5085	6.69938		Adj. R-Square	0.926304
eEJC Amplitude (nA) in 0.3 mM Calcium Conc.	9	0.76066	0.164006	59.1337	7.93702				Value	Standard Error
eEJC Amplitude (nA) in 0.4 mM Calcium Conc.	9	0.699999	0.134472	58.1921	8.1677		Null	Vmax (maximum value at high Ca2+)	3.87715	0.607952
eEJC Amplitude (nA) in 0.6 mM Calcium Conc.	10	1.51183	0.224913	40.678	5.64406		Null	k (EC50)	0.900307	0.264128
eEJC Amplitude (nA) in 0.8 mM Calcium Conc.	15	1.87776	0.210756	33.7903	6.27748		Null	n (the cooperativity index)	1.50952	0.398119
eEJC Amplitude (nA) in 1.0 mM Calcium Conc.	8	1.54626	0.396791	40.8898	10.8122
eEJC Amplitude (nA) in 2.0 mM Calcium Conc.	14	3.49692	0.564447	26.3296	8.57663
eEJC Amplitude (nA) in 4.0 mM Calcium Conc.	8	3.28371	0.549954	17.5847	5.04359

## Sheet: Figure 8H WT SYT Rescue data
Figure 8—source data 7
Sample size (n), mean, SEM, and Hill Fit of WT SYT Rescue are presented for the data in Figures 8H.
WT SYT Rescue	n	mean(nA)	SEM(nA)	Failure Ratio(%)	SEM(%)		Model	Hill
eEJC Amplitude (nA) in 0.1 mM Calcium Conc.	13	1.65235	0.648243	48.3703	9.82619		Equation	y=Vmax*x^n/(k^n+x^n)
eEJC Amplitude (nA) in 0.175 mM Calcium Conc.	11	2.02114	0.731325	38.6189	8.6742		Reduced Chi-Sqr	55.6589
eEJC Amplitude (nA) in 0.25 mM Calcium Conc.	11	3.16977	0.351391	11.094	4.74116		Adj. R-Square	0.957504
eEJC Amplitude (nA) in 0.3 mM Calcium Conc.	11	5.33203	1.10894	8.01233	4.28229				Value	Standard Error
eEJC Amplitude (nA) in 0.4 mM Calcium Conc.	11	10.2191	1.92896	7.08783	5.35403		WT SYT Rescue	Vmax (maximum value at high Ca2+)	92.3454	6.74646
eEJC Amplitude (nA) in 0.6 mM Calcium Conc.	14	26.5297	3.31601	0	0		WT SYT Rescue	k (EC50)	0.792631	0.0742466
eEJC Amplitude (nA) in 0.8 mM Calcium Conc.	10	56.9651	15.8465	0	0		WT SYT Rescue	n (the cooperativity index)	2.92201	0.695632
eEJC Amplitude (nA) in 1.0 mM Calcium Conc.	9	49.4703	8.91312	0	0
eEJC Amplitude (nA) in 2.0 mM Calcium Conc.	21	96.6326	9.82077	0	0
eEJC Amplitude (nA) in 4.0 mM Calcium Conc.	8	85.3445	14.9492	0	0

## Sheet: Figure 8H R250H SYT Rescue data
Figure 8—source data 7
Sample size (n), mean, SEM, and Hill Fit of R250H SYT Rescue are presented for the data in Figures 8H.
R250H SYT Rescue	n	mean(nA)	SEM(nA)	Failure Ratio(%)	SEM(%)		Model	Hill
eEJC Amplitude (nA) in 0.1 mM Calcium Conc.	9	0.546792	0.181094	70.2448	9.30966		Equation	y=Vmax*x^n/(k^n+x^n)
eEJC Amplitude (nA) in 0.175 mM Calcium Conc.	13	0.539104	0.134808	63.459	6.56827		Reduced Chi-Sqr	16.3281
eEJC Amplitude (nA) in 0.25 mM Calcium Conc.	11	3.33051	0.659012	14.9461	4.78204		Adj. R-Square	0.938537
eEJC Amplitude (nA) in 0.3 mM Calcium Conc.	12	3.15584	0.315658	13.1356	4.2405				Value	Standard Error
eEJC Amplitude (nA) in 0.4 mM Calcium Conc.	10	5.3099	1.15407	10.339	4.58603		R250H SYT Rescue	Vmax (maximum value at high Ca2+)	52.201	8.44938
eEJC Amplitude (nA) in 0.6 mM Calcium Conc.	10	13.5002	3.58513	2.88136	1.92505		R250H SYT Rescue	k (EC50)	1.35883	0.332136
eEJC Amplitude (nA) in 0.8 mM Calcium Conc.	11	11.4303	2.26824	7.70416	5.8507		R250H SYT Rescue	n (the cooperativity index)	2.08287	0.584226
eEJC Amplitude (nA) in 1.0 mM Calcium Conc.	10	11.3195	1.54252	0	0
eEJC Amplitude (nA) in 2.0 mM Calcium Conc.	20	41.1651	6.12193	0.645682	0.645682
eEJC Amplitude (nA) in 4.0 mM Calcium Conc.	6	45.1746	8.15616	0	0

## Sheet: Figure 8H K379E SYT Rescue data
Figure 8—source data 7
Sample size (n), mean, SEM, and Hill Fit of K379E SYT Rescue are presented for the data in Figures 8H.
K379E SYT Rescue	n	mean(nA)	SEM(nA)	Failure Ratio(%)	SEM(%)		Model	Hill
eEJC Amplitude (nA) in 0.1 mM Calcium Conc.	9	0.667968	0.376352	78.1544	10.1043		Equation	y=Vmax*x^n/(k^n+x^n)
eEJC Amplitude (nA) in 0.175 mM Calcium Conc.	12	2.04092	0.41638	28.2486	7.68917		Reduced Chi-Sqr	38.0513
eEJC Amplitude (nA) in 0.25 mM Calcium Conc.	12	2.75672	0.439752	16.3842	6.99869		Adj. R-Square	0.916782
eEJC Amplitude (nA) in 0.3 mM Calcium Conc.	15	6.59441	1.09468	3.38983	2.10528				Value	Standard Error
eEJC Amplitude (nA) in 0.4 mM Calcium Conc.	13	10.8178	1.58335	0	0		K379E SYT Rescue	Vmax (maximum value at high Ca2+)	61.5241	8.62534
eEJC Amplitude (nA) in 0.6 mM Calcium Conc.	10	28.3945	3.57371	0	0		K379E SYT Rescue	k (EC50)	0.887686	0.2026
eEJC Amplitude (nA) in 0.8 mM Calcium Conc.	10	25.9848	2.05782	0	0		K379E SYT Rescue	n (the cooperativity index)	1.93184	0.580283
eEJC Amplitude (nA) in 1.0 mM Calcium Conc.	12	24.8301	5.35633	0	0
eEJC Amplitude (nA) in 2.0 mM Calcium Conc.	19	59.6784	5.5404	0	0
eEJC Amplitude (nA) in 4.0 mM Calcium Conc.	6	54.3448	12.6288	0	0

## Sheet: Figure 8H S332L SYT Rescue data
Figure 8—source data 7
Sample size (n), mean, SEM, and Hill Fit of S332L SYT Rescue are presented for the data in Figures 8H.
S332L SYT Rescue	n	mean(nA)	SEM(nA)	Failure Ratio(%)	SEM(%)		Model	Hill
eEJC Amplitude (nA) in 0.1 mM Calcium Conc.	9	0.130286	0.0431484	91.7137	2.50195		Equation	y=Vmax*x^n/(k^n+x^n)
eEJC Amplitude (nA) in 0.175 mM Calcium Conc.	13	0.381198	0.0775263	75.6193	4.6912		Reduced Chi-Sqr	4.93939
eEJC Amplitude (nA) in 0.25 mM Calcium Conc.	13	0.787421	0.110565	49.4133	5.09143		Adj. R-Square	0.916759
eEJC Amplitude (nA) in 0.3 mM Calcium Conc.	10	2.94671	0.575223	21.5254	6.07995				Value	Standard Error
eEJC Amplitude (nA) in 0.4 mM Calcium Conc.	9	3.7581	0.684901	9.79284	2.70624		S332L SYT Rescue	Vmax (maximum value at high Ca2+)	22.0096	3.19744
eEJC Amplitude (nA) in 0.6 mM Calcium Conc.	11	4.44997	1.29223	13.5273	3.70647		S332L SYT Rescue	k (EC50)	0.945073	0.219232
eEJC Amplitude (nA) in 0.8 mM Calcium Conc.	10	7.79663	1.81232	0.508475	0.361758		S332L SYT Rescue	n (the cooperativity index)	1.99462	0.623412
eEJC Amplitude (nA) in 1.0 mM Calcium Conc.	10	15.7358	4.06251	10.2986	8.15009
eEJC Amplitude (nA) in 2.0 mM Calcium Conc.	17	15.0199	3.04476	0.20284	0.20284
eEJC Amplitude (nA) in 4.0 mM Calcium Conc.	10	22.1909	4.17794	0.338983	0.338983

## Sheet: Figure 8H R334H SYT Rescue data
Figure 8—source data 7
Sample size (n), mean, SEM, and Hill Fit of R334H SYT Rescue are presented for the data in Figures 8H.
R334H SYT Rescue	n	mean(nA)	SEM(nA)	Failure Ratio(%)	SEM(%)		Model	Hill
eEJC Amplitude (nA) in 0.1 mM Calcium Conc.	8	0.116677	0.049387	92.161	2.96934		Equation	y=Vmax*x^n/(k^n+x^n)
eEJC Amplitude (nA) in 0.175 mM Calcium Conc.	10	0.383649	0.119577	71.5254	8.33329		Reduced Chi-Sqr	0.17871
eEJC Amplitude (nA) in 0.25 mM Calcium Conc.	14	1.17888	0.159381	37.7724	5.86444		Adj. R-Square	0.988693
eEJC Amplitude (nA) in 0.3 mM Calcium Conc.	10	0.713953	0.195191	65.5932	6.94272				Value	Standard Error
eEJC Amplitude (nA) in 0.4 mM Calcium Conc.	11	2.05715	0.506386	40.3698	10.0528		R334H SYT Rescue	Vmax (maximum value at high Ca2+)	16.6465	2.24335
eEJC Amplitude (nA) in 0.6 mM Calcium Conc.	9	3.07797	0.587038	23.1638	7.60616		R334H SYT Rescue	k (EC50)	1.92849	0.441957
eEJC Amplitude (nA) in 0.8 mM Calcium Conc.	10	3.29656	0.451022	18.6441	6.56924		R334H SYT Rescue	n (the cooperativity index)	1.43327	0.174461
eEJC Amplitude (nA) in 1.0 mM Calcium Conc.	10	4.18092	0.743173	11.676	5.50156
eEJC Amplitude (nA) in 2.0 mM Calcium Conc.	19	8.92587	1.06047	10.8893	6.23051
eEJC Amplitude (nA) in 4.0 mM Calcium Conc.	11	12.2096	1.90533	0	0

## Sheet: Figure8H Regression Analysidata
Figure 8—source data 7
Regression Analysis are presented for the data in Figures 8H.
Summary of Regression Model Results: compared to SYT Null
Dependent Variable: log__eEJC-Amp (log_Calcium concentration: 0.3mM, 0.4mM, 0.6mM, 0.8mM)
# Samples	258
Regression Analysis	Coefficient estimates (P-values)	p-values	Adjusted P Value	Summary
interaction WT SYT Rescue^ SYT Null	1.669 (0.000)	0	<0.0001	****
interaction R250H SYT Rescue ^ SYT Null	0.304 (0.473)	0.473	> 0.9999	ns
interaction K379E SYT Rescue ^ SYT Null	0.906 (0.030)	0.03	0.3	ns
interaction S332L SYT Rescue ^ SYT Null	0.058 (0.893)	0.893	> 0.9999	ns
interaction R334H SYT Rescue ^ SYT Null	1.087 (0.013)	0.013	0.13	ns
Summary of Regression Model Results: compared to WT SYT Rescue
Dependent Variable: log__eEJC-Amp (log_Calcium concentration: 0.3mM, 0.4mM, 0.6mM, 0.8mM)
# Samples	217
Regression Analysis	Coefficient estimates (P-values)	p-values	Adjusted P Value	Summary
interaction R250H SYT Rescue ^ WT SYT Rescue	-1.365 (0.002)	0.002	0.02	*
interaction K379E SYT Rescue ^ WT SYT Rescue	-0.763 (0.070)	0.07	0.7	ns
interaction S332L SYT Rescue ^ WT SYT Rescue	-1.61 (0.000)	0	<0.0001	****
interaction R334H SYT Rescue ^ WT SYT Rescue	-0.582 (0.185)	0.185	> 0.9999	ns
Summary of Regression Model Results: R334H SYT Rescue compared to S332L SYT Rescue
Dependent Variable: log__eEJC-Amp (log_Calcium concentration: 0.3mM, 0.4mM, 0.6mM, 0.8mM)
# Samples	80
Regression Analysis	Coefficient estimates (P-values)	p-values	Adjusted P Value	Summary
interaction R334H SYT Rescue ^ S332L SYT Rescue	1.028 (0.042)	0.042	0.4	ns

[truncated: 5 more sheets: Figure 9 source data, Figure1-figure supplement 1 dat, Figure2-fig supplement 2 data, Figure 3-fig supplement 2 , Figure 9-fig supplement 1]
