# Supplementary figures and images for: A synaptotagmin suppressor screen indicates SNARE binding controls the timing and Ca2+ cooperativity of vesicle fusion
Source: eLife journal article supplement (doi:10.7554/elife.28409), 2017-09-12

Figure1 - figure supplement 1

A

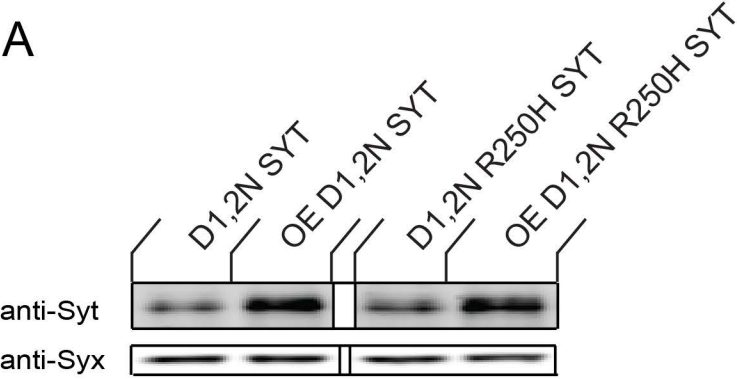

B

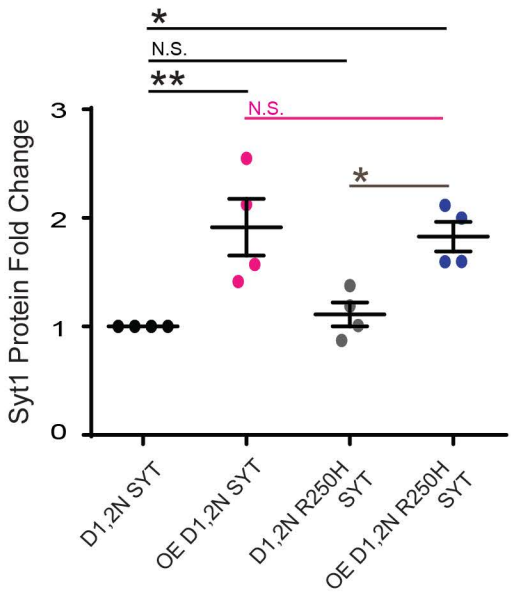

C

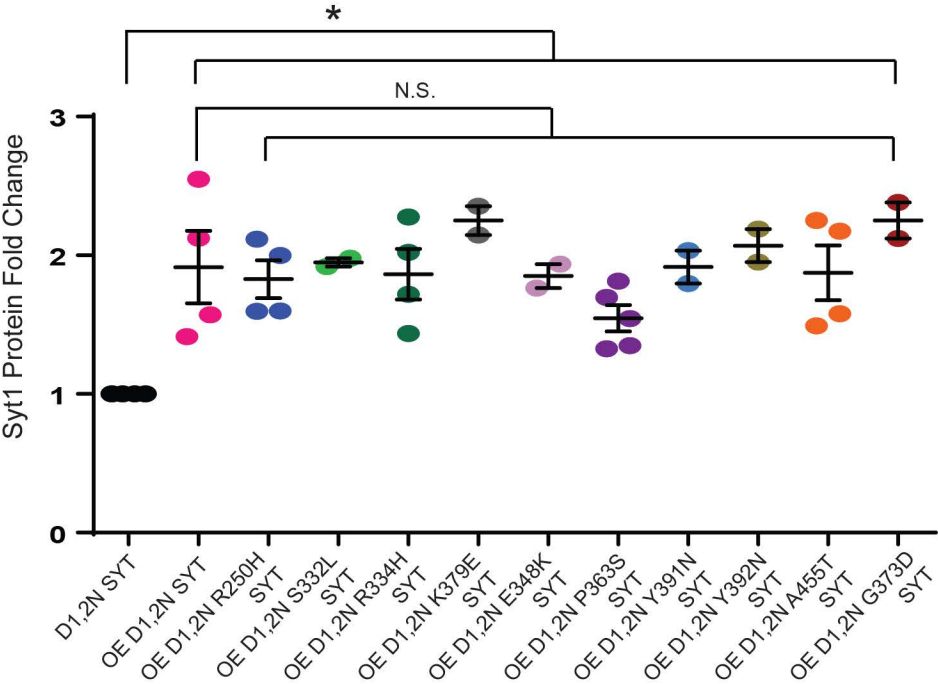

D

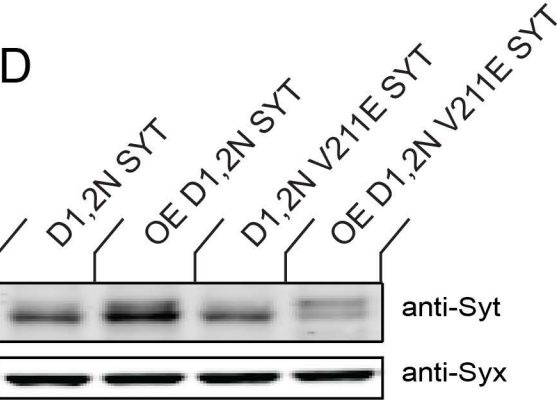

E

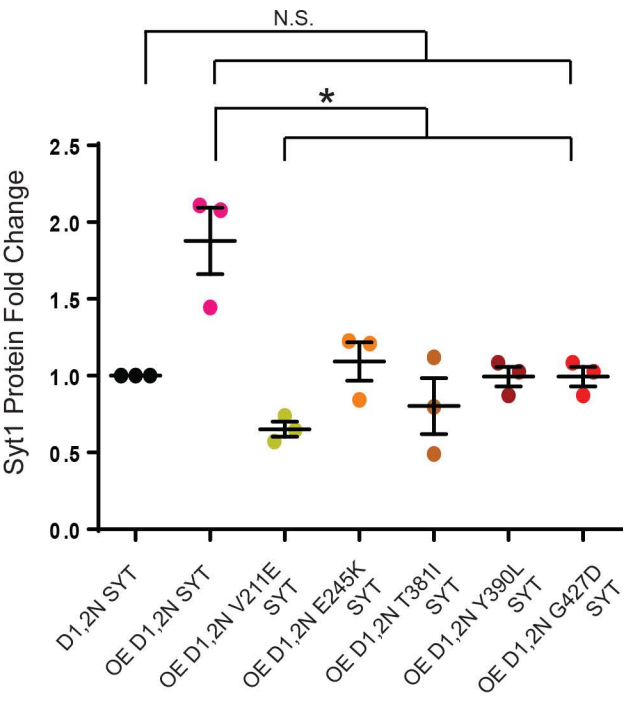

Supplement: supp [file elife_poa_e28409_Figure1_figure_supplement_1.pdf › elife_poa_e28409_Figure1_figure_supplement_1.pdf]

Figure 2 - figure supplement 1

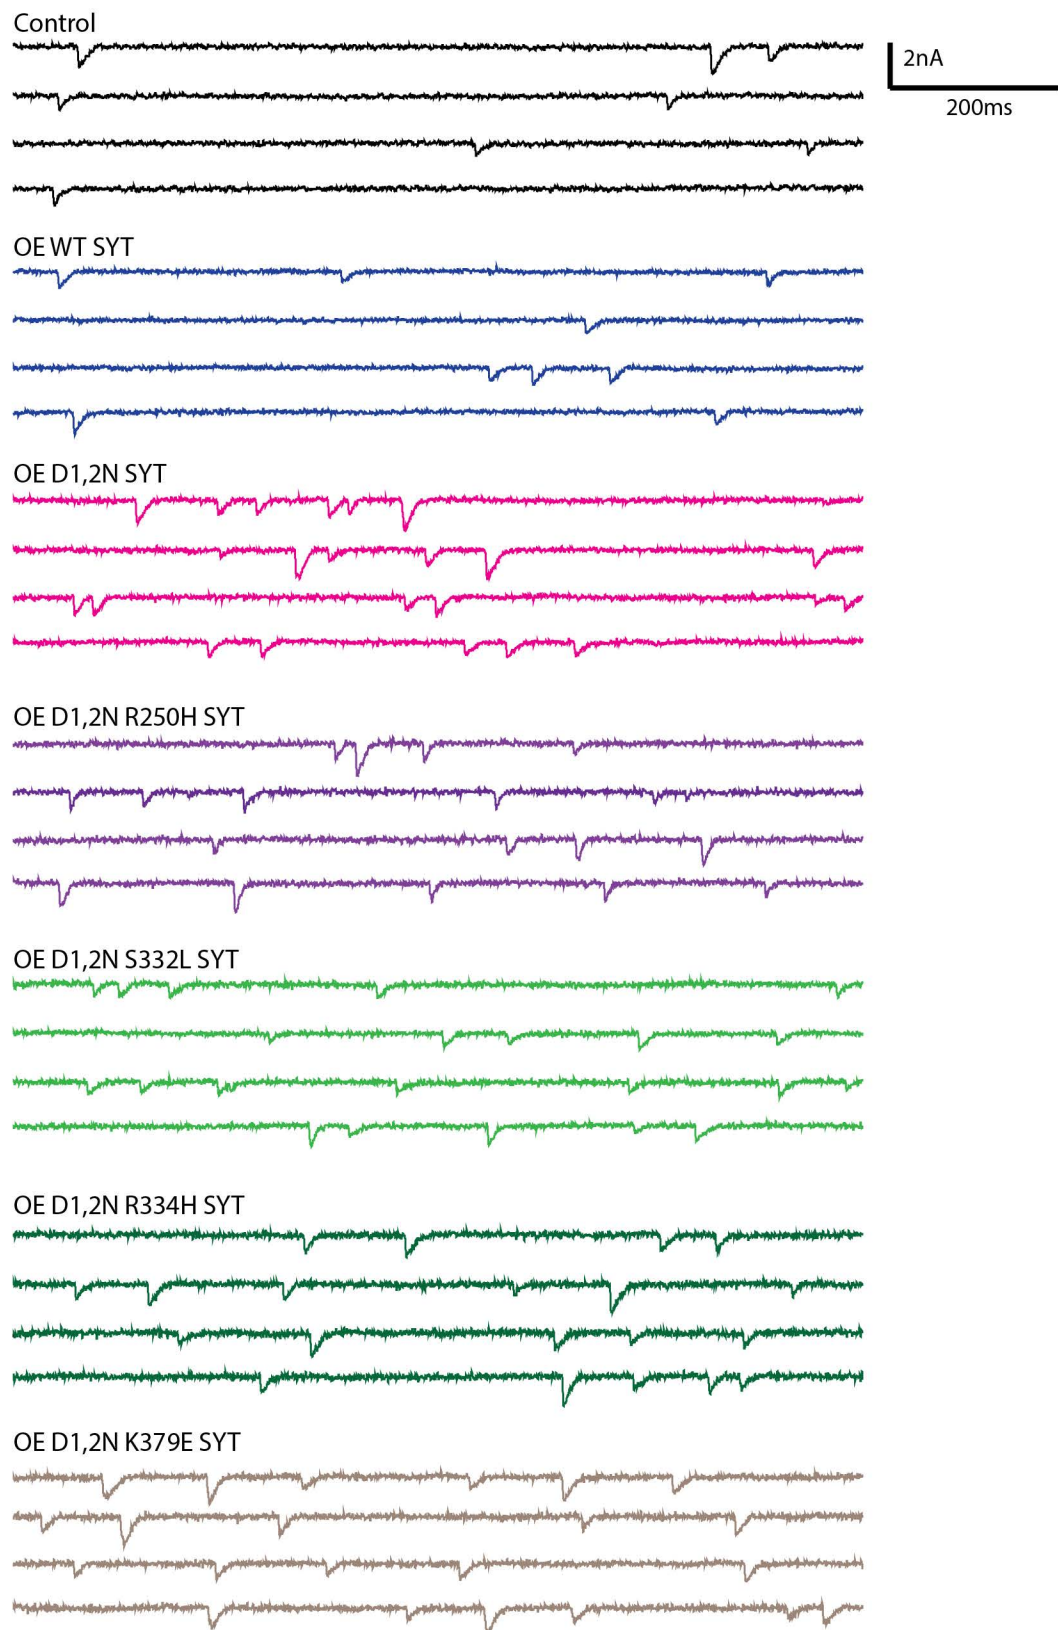

Supplement: supp [file elife_poa_e28409_Figure_2_figure_supplement_1.pdf › elife_poa_e28409_Figure_2_figure_supplement_1.pdf]

Figure 2 - figure supplement 2

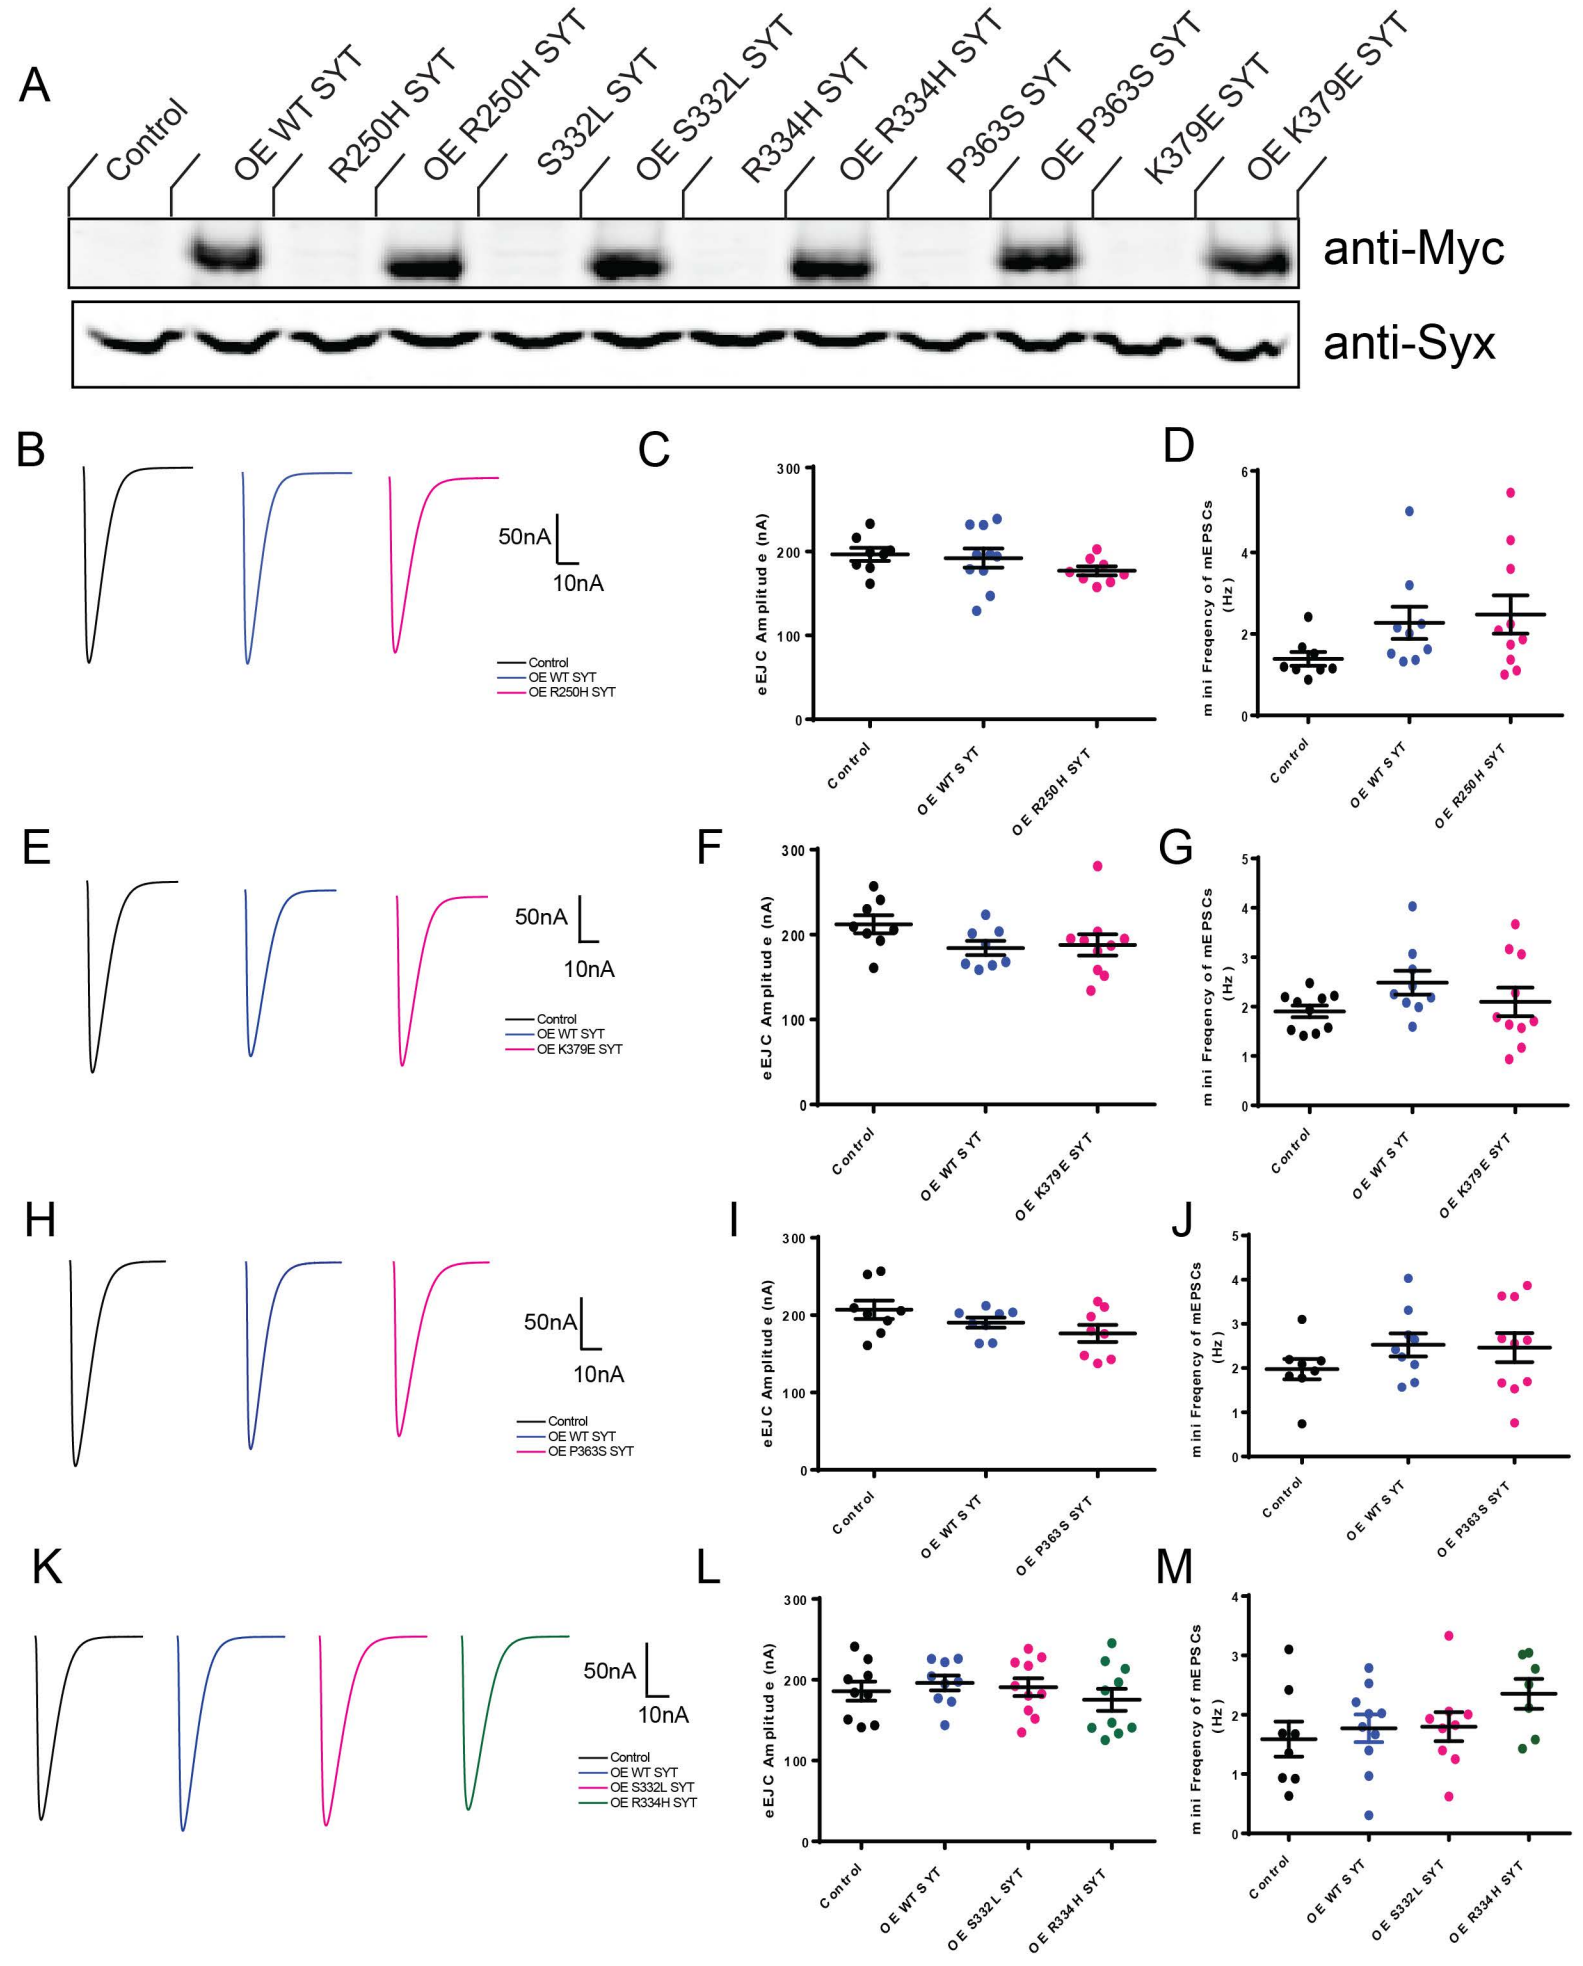

Supplement: supp [file elife_poa_e28409_Figure_2_figure_supplement_2.pdf › elife_poa_e28409_Figure_2_figure_supplement_2.pdf]

Figure 3 - figure supplement 1

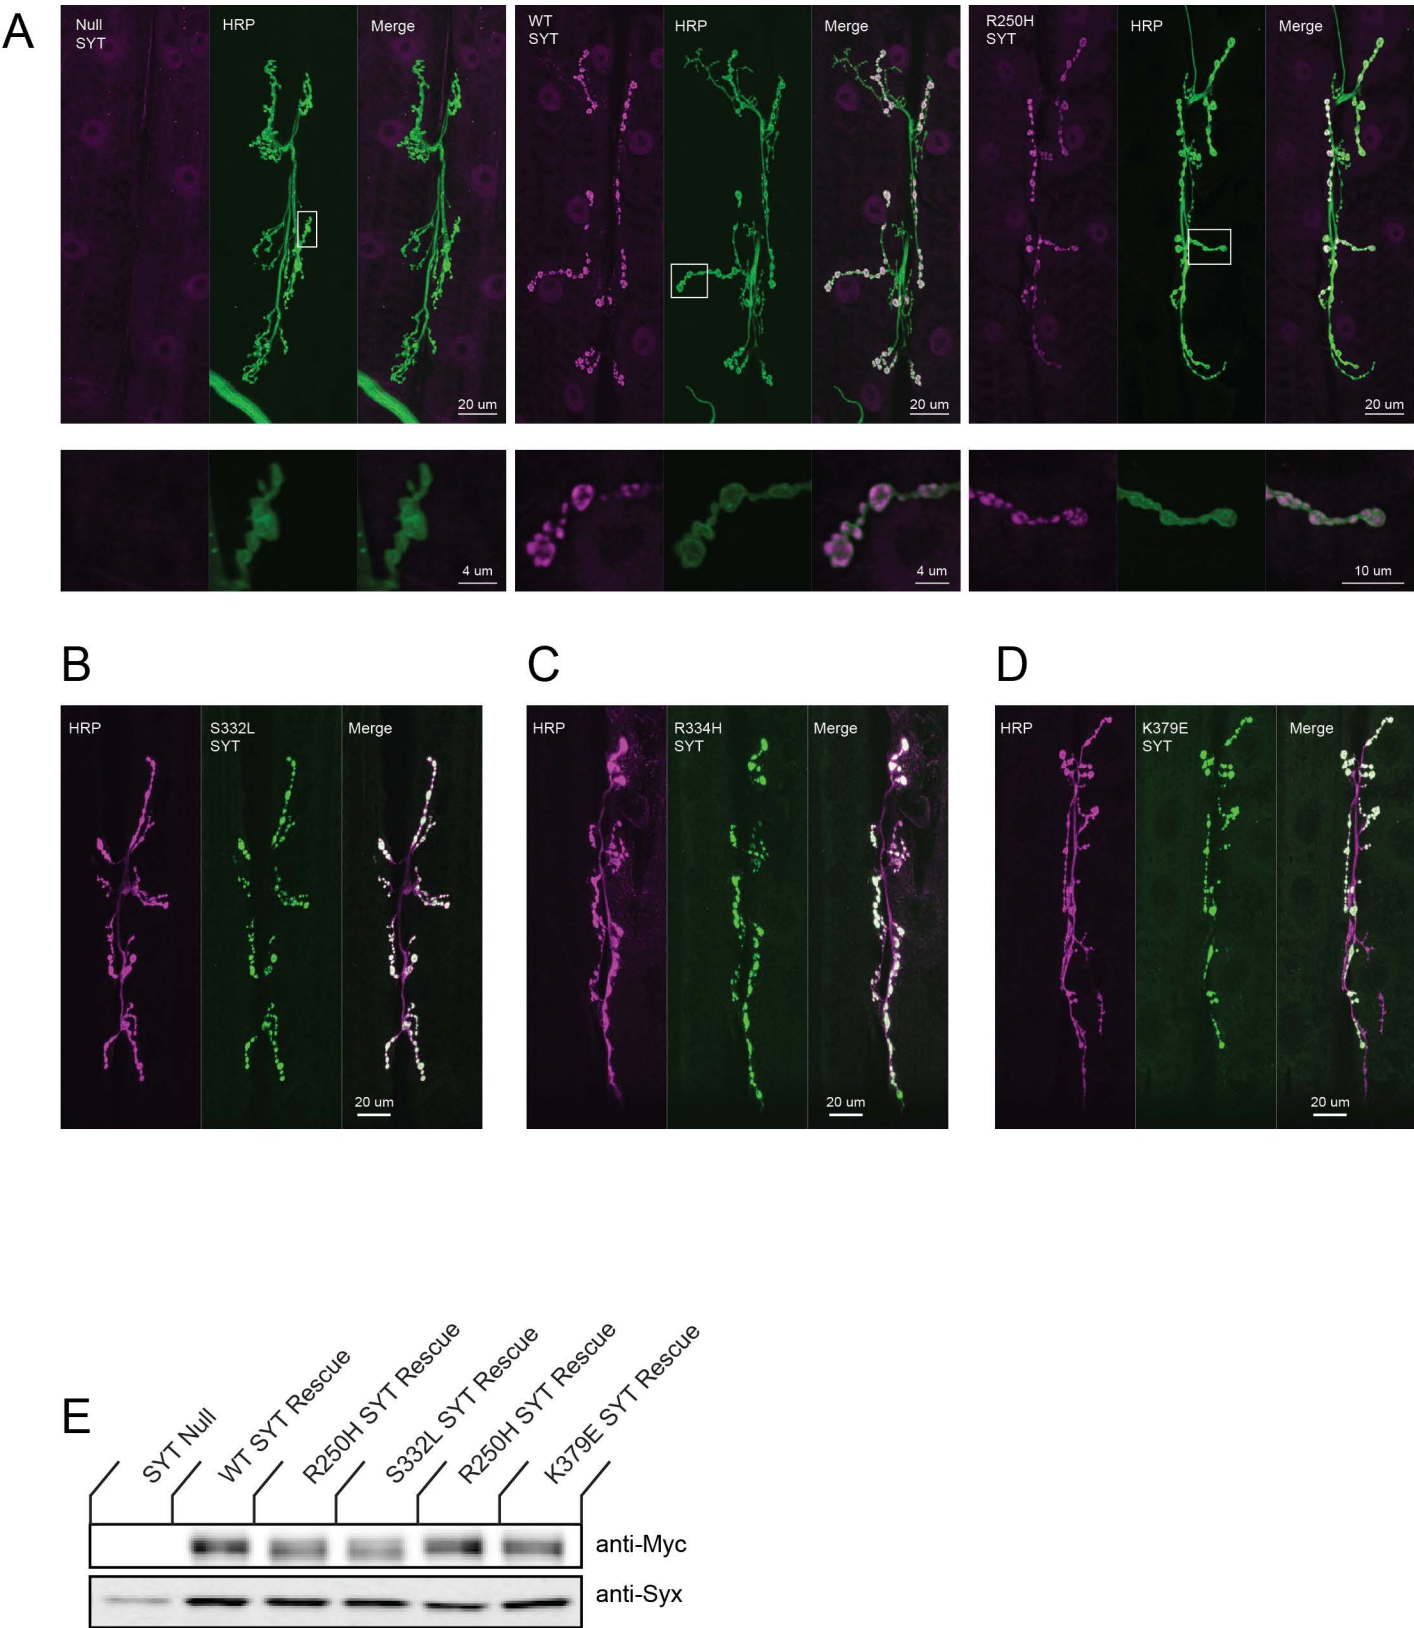

Supplement: supp [file elife_poa_e28409_Figure_3_figure_supplement_1.pdf › elife_poa_e28409_Figure_3_figure_supplement_1.pdf]

Figure 3 - figure supplement 3

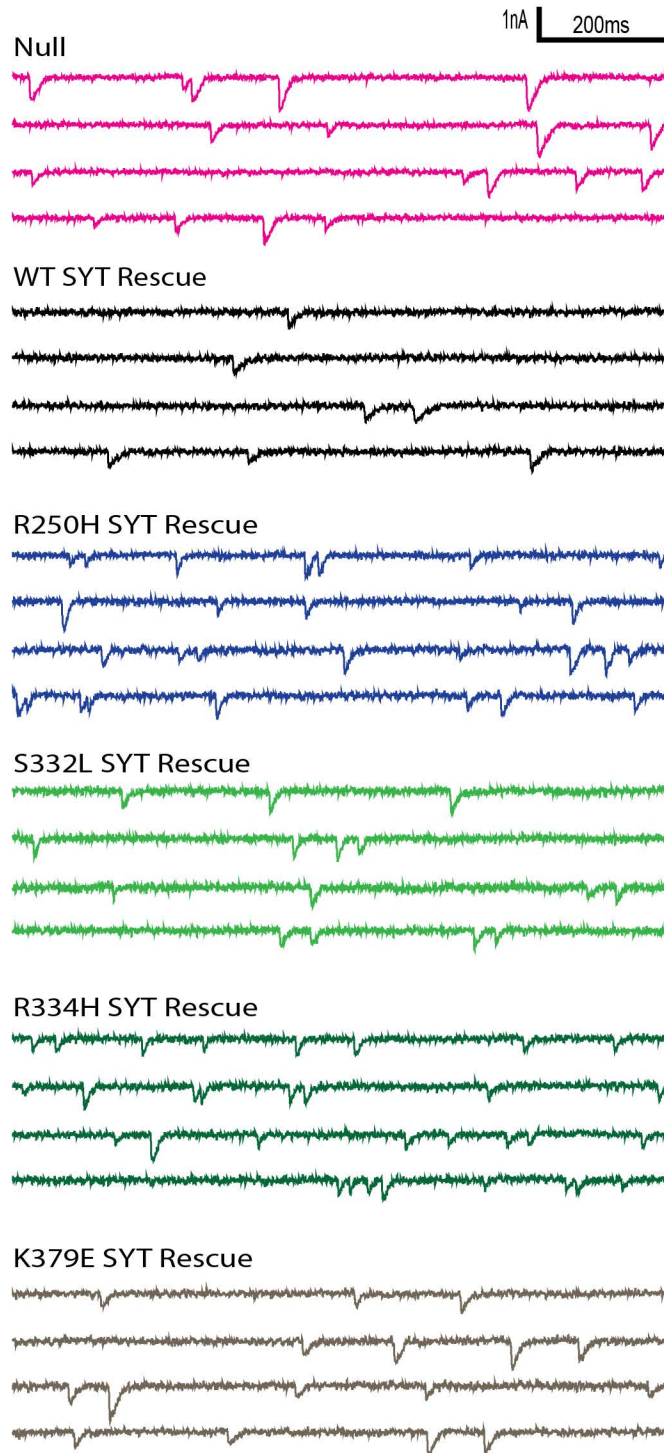

Supplement: supp [file elife_poa_e28409_Figure_3_figure_supplement_3.pdf › elife_poa_e28409_Figure_3_figure_supplement_3.pdf]

Figure 9 - figure supplement 1

A

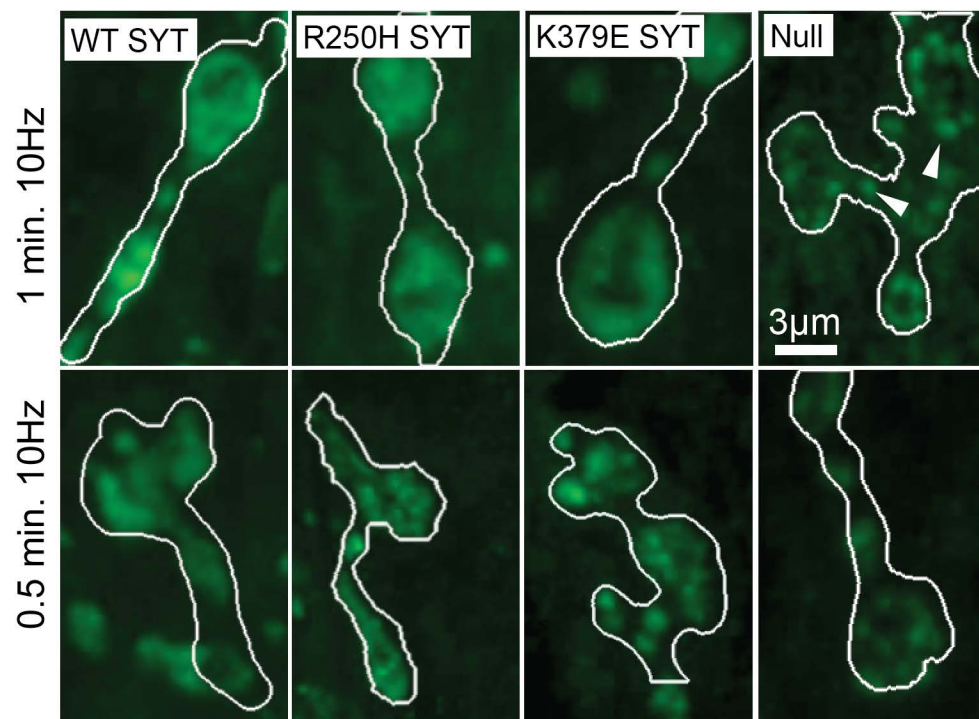

B

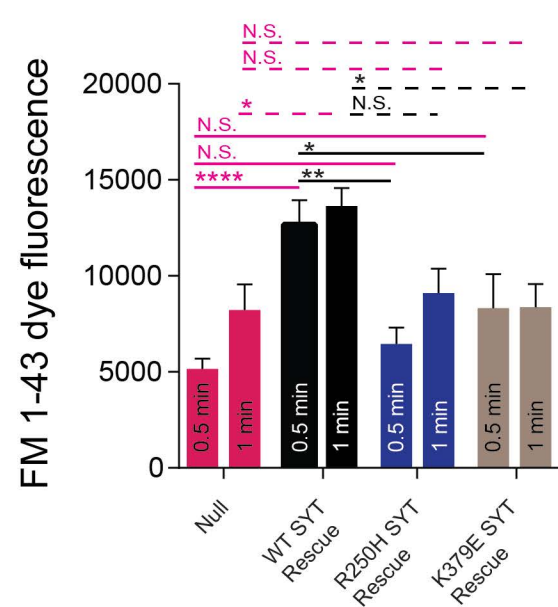

D

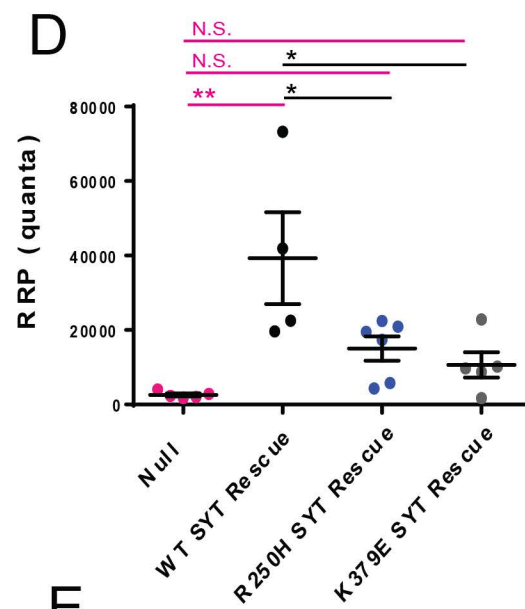

E

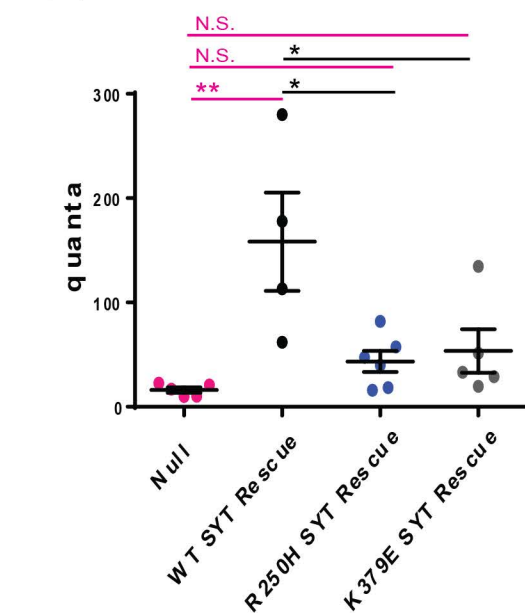

C

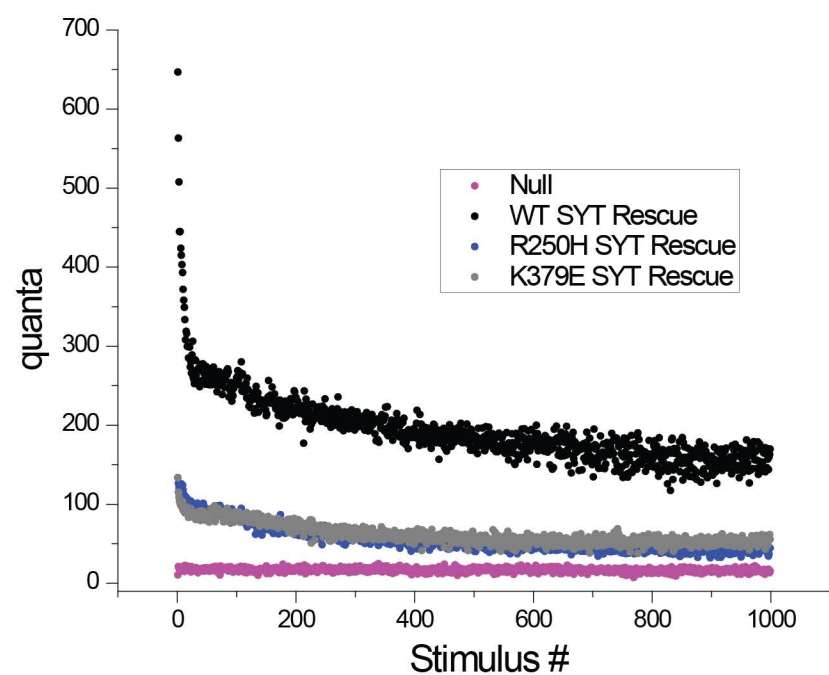

Supplement: supp [file elife_poa_e28409_Figure_9_figure_supplement_1.pdf › elife_poa_e28409_Figure_9_figure_supplement_1.pdf]
